# Supplementary material for: A Model Study of Water Inrush in Underground Roadways
Source: Atypon-hosted journal article supplement (doi:10.1061/ijgnai.gmeng-9539), 2024-11-26
Supplement: supplemental_materials_ijgnai.gmeng-9539_yang.pdf [file supplemental_materials_ijgnai.gmeng-9539_yang.pdf]

# SUPPLEMENTAL MATERIALS

*ASCE International Journal of Geomechanics*

## A Model Study of Water Inrush in Underground Roadways

Junhong Yang, Jiwei Li, Hangyu Zhu, Hongbiao Wu, Ziyi Zhou,  
and Jianguang Li

**DOI:** 10.1061/IJGNAI.GMENG-9539

© ASCE 2024

[www.ascelibrary.org](http://www.ascelibrary.org)

# 1. Each factor sensitive analysis chart and variance analysis table

## 1.1 Compressive strength

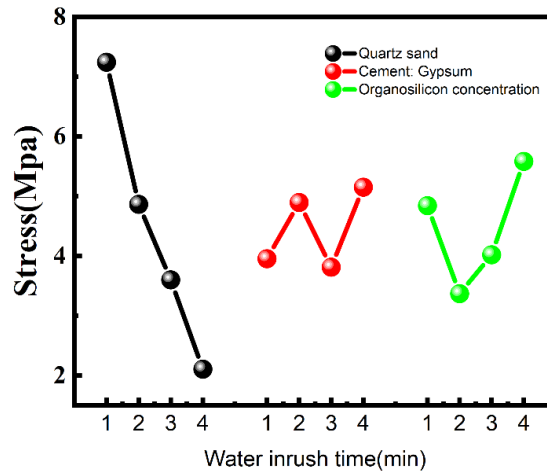

**Figure 1.** Compressive strength sensitive analysis diagram

| factor                        | Deviation sum of squares | Degree of freedom | F ratio | Fcritical value | Contribution rate /% |
|-------------------------------|--------------------------|-------------------|---------|-----------------|----------------------|
| Quartz sand content           | 56.776                   | 3                 | 2.323   | 3.860           | 77.44                |
| Cement: gypsum                | 5.372                    | 3                 | 0.22    | 3.860           | 7.33                 |
| the concentration of silicone | 11.168                   | 3                 | 0.457   | 3.860           | 15.23                |
| error                         | 73.316                   | 9                 |         |                 |                      |

**Table 1.** Variance analysis of compressive strength

## 1.2 Elastic modulus

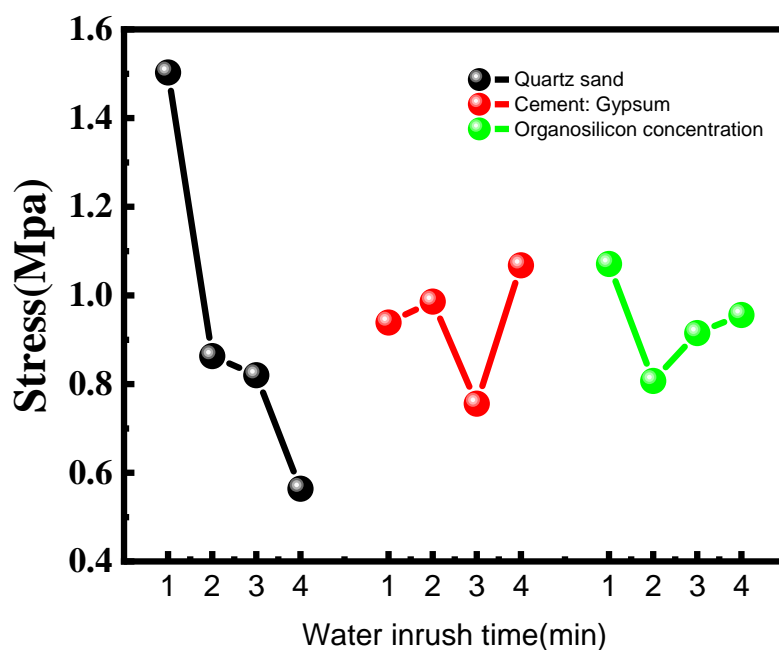

**Figure 2.** Elastic modulus sensitive analysis diagram

| factor                        | Deviation sum of squares | Degree of freedom | F ratio | F critical value | Contribution rate /% |
|-------------------------------|--------------------------|-------------------|---------|------------------|----------------------|
| Quartz sand content           | 1.918                    | 3                 | 2.533   | 3.860            | 84.42                |
| Cement: gypsum                | 0.21                     | 3                 | 0.277   | 3.860            | 9.24                 |
| the concentration of silicone | 0.144                    | 3                 | 0.19    | 3.860            | 6.34                 |
| error                         | 2.272                    | 9                 |         |                  |                      |

**Table 2.** Variance analysis of elastic modulus

### 1.3 Water absorption

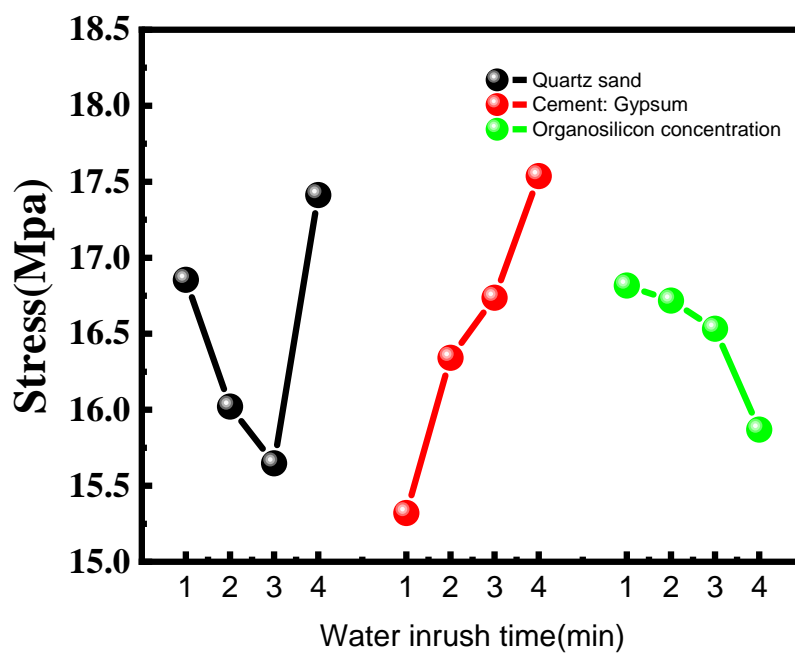

**Figure 3.** Water absorption sensitive analysis diagram

| factor                        | Deviation sum of squares | Degree of freedom | F ratio | F critical value | Contribution rate /% |
|-------------------------------|--------------------------|-------------------|---------|------------------|----------------------|
| Quartz sand content           | 7.658                    | 3                 | 1.147   | 3.860            | 38.25                |
| Cement: gypsum                | 10.182                   | 3                 | 1.526   | 3.860            | 50.85                |
| the concentration of silicone | 2.182                    | 3                 | 0.327   | 3.860            | 10.90                |
| error                         | 20.022                   | 9                 |         |                  |                      |

**Table 3.** Variance analysis of water absorption

### 1.4 Softening coefficient

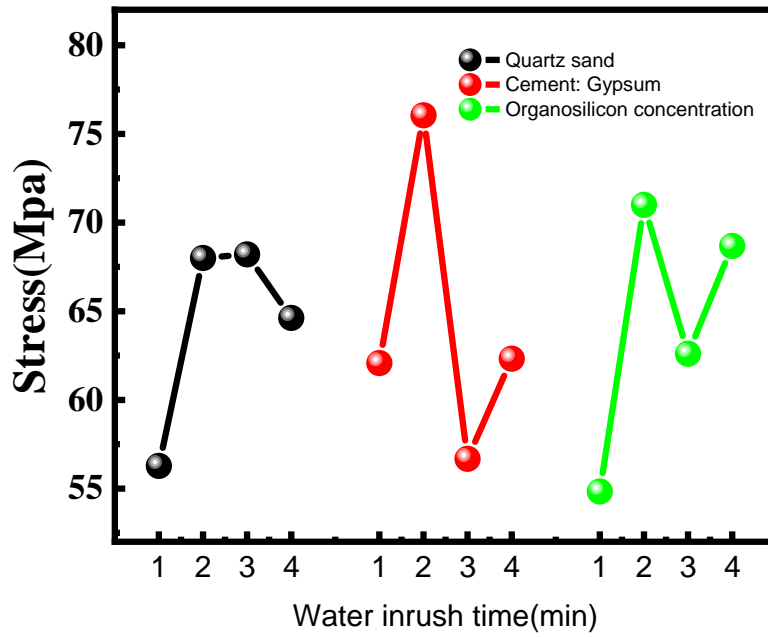

**Figure 4.** Softening coefficient sensitive analysis diagram

| factor                        | Deviation sum of squares | Degree of freedom | F ratio | F critical value | Contribution rate /% |
|-------------------------------|--------------------------|-------------------|---------|------------------|----------------------|
| Quartz sand content           | 373.367                  | 3                 | 0.616   | 3.860            | 20.52                |
| Cement: gypsum                | 819.712                  | 3                 | 1.352   | 3.860            | 45.06                |
| the concentration of silicone | 626.027                  | 3                 | 1.032   | 3.860            | 34.41                |
| error                         | 1819.106                 | 9                 |         |                  |                      |

**Table 4.** Variance analysis of softening coefficient

### 1.5 Permeability coefficient

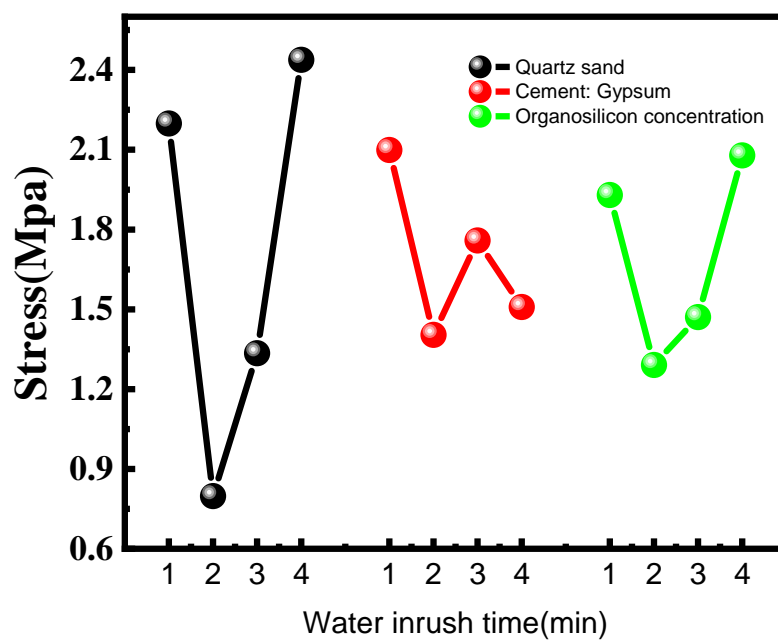

**Figure 5.** Permeability coefficient sensitive analysis diagram

| factor                        | Deviation sum of squares | Degree of freedom | F ratio | F critical value | Contribution rate /% |
|-------------------------------|--------------------------|-------------------|---------|------------------|----------------------|
| Quartz sand content           | 6.958                    | 3                 | 2.137   | 3.860            | 71.24                |
| Cement: gypsum                | 1.145                    | 3                 | 0.352   | 3.860            | 11.72                |
| the concentration of silicone | 1.664                    | 3                 | 0.511   | 3.860            | 17.04                |
| error                         | 9.767                    | 9                 |         |                  |                      |

**Table 5.** Variance analysis of permeability coefficient

### 1.6 Tensile strength

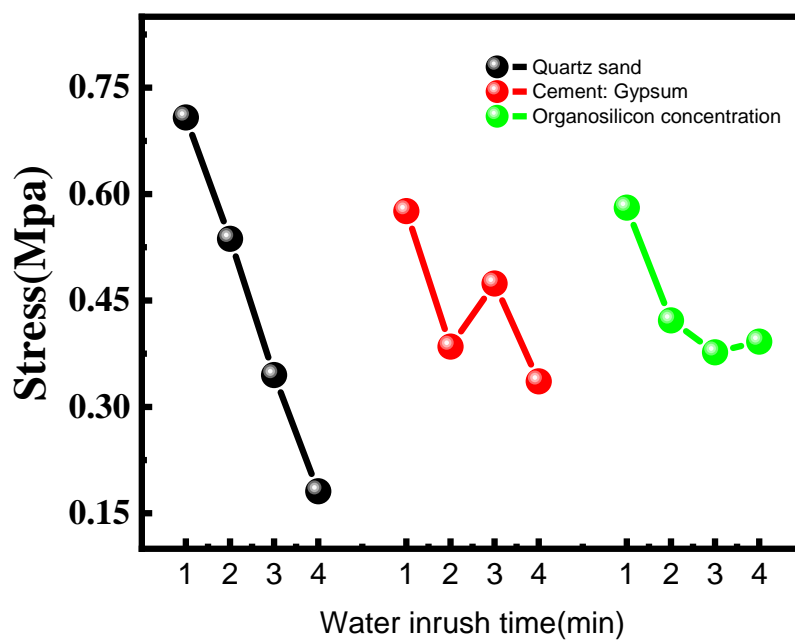

**Figure 6.** Tensile strength sensitive analysis diagram

| factor                        | Deviation sum of squares | Degree of freedom | F ratio | F critical value | Contribution rate /% |
|-------------------------------|--------------------------|-------------------|---------|------------------|----------------------|
| Quartz sand content           | 0.625                    | 3                 | 2.180   | 3.860            | 72.67                |
| Cement: gypsum                | 0.132                    | 3                 | 0.460   | 3.860            | 15.35                |
| the concentration of silicone | 0.103                    | 3                 | 0.359   | 3.860            | 11.98                |
| error                         | 0.86                     | 9                 |         |                  |                      |

**Table 6.** Variance analysis of tensile strength

### 1.7 Density

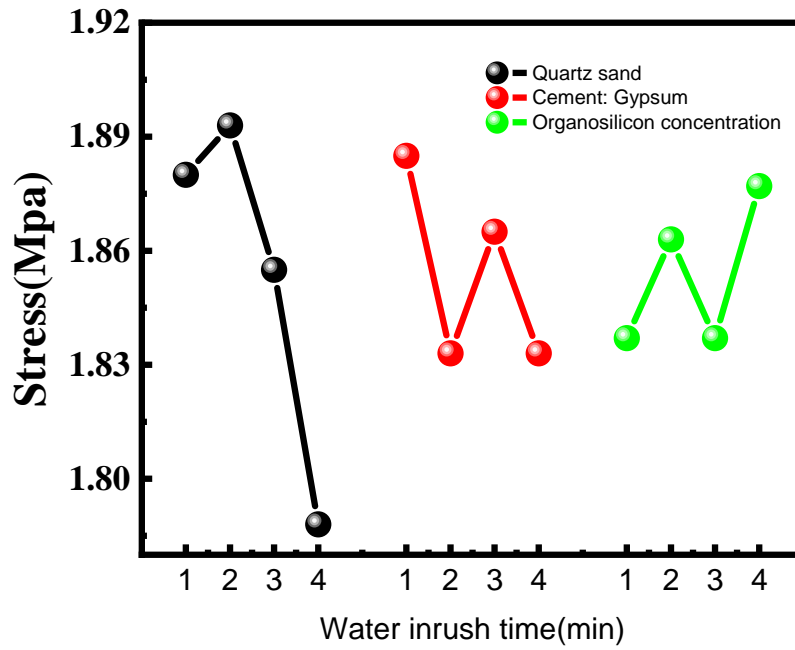

**Figure 7.** Density sensitive analysis diagram

| factor                        | Deviation sum of squares | Degree of freedom | F ratio | F critical value | Contribution rate /% |
|-------------------------------|--------------------------|-------------------|---------|------------------|----------------------|
| Quartz sand content           | 0.026                    | 3                 | 2.000   | 3.860            | 66.67                |
| Cement: gypsum                | 0.008                    | 3                 | 0.615   | 3.860            | 20.51                |
| the concentration of silicone | 0.005                    | 3                 | 0.385   | 3.860            | 12.82                |
| error                         | 0.039                    | 9                 |         |                  |                      |

**Table 6.** Variance analysis of density



## 2. Diagram of stress variation with time during water inrush in roadway

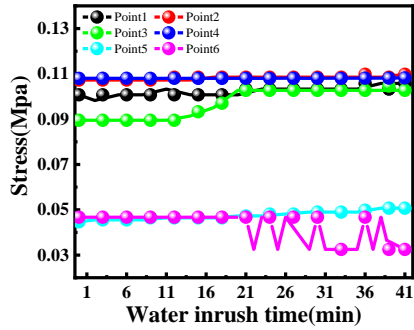

Test-1

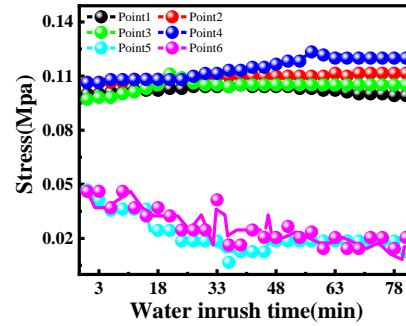

Test-2

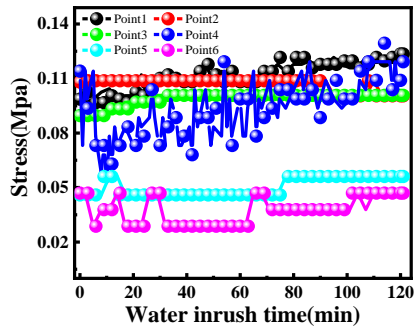

Test-3

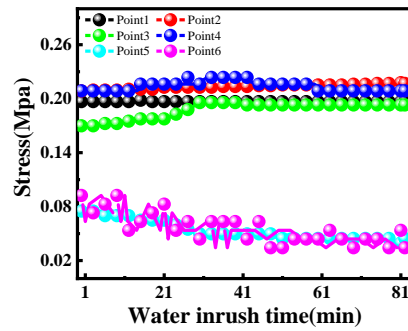

Test-4

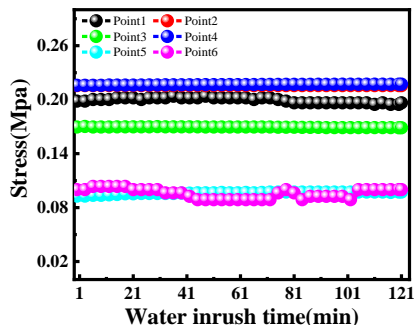

Test-5

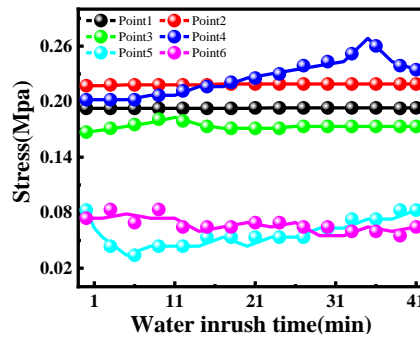

Test-6

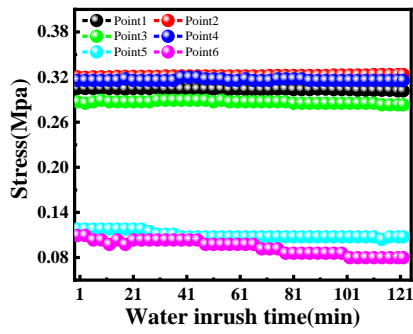

Test-7

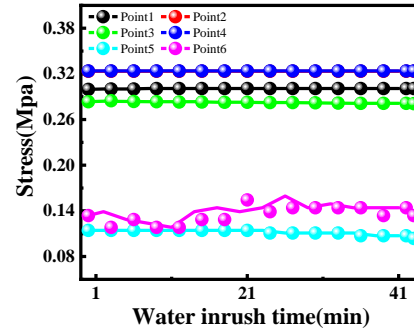

Test-8

## 2. Convergence diagram of displacement with time during roadway water inrush.

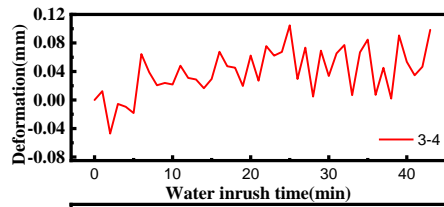

Test-1

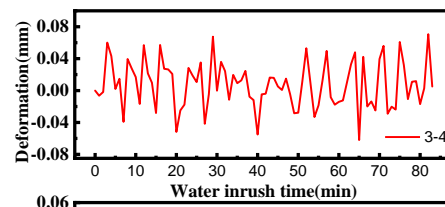

Test-2

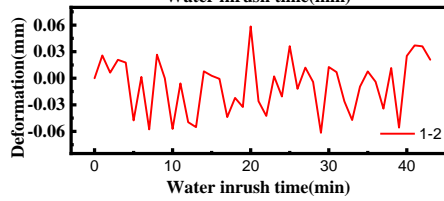

Test-3

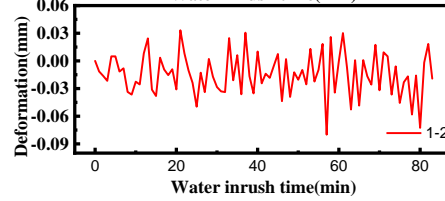

Test-4

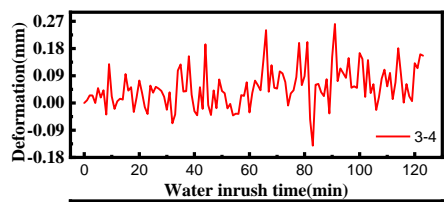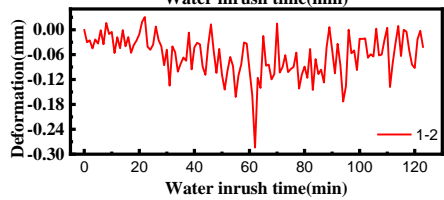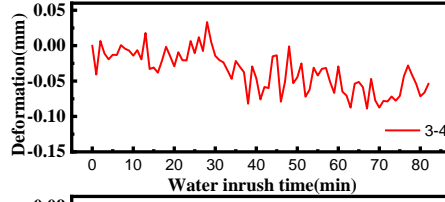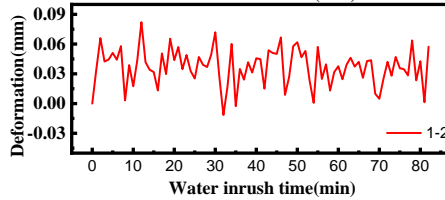

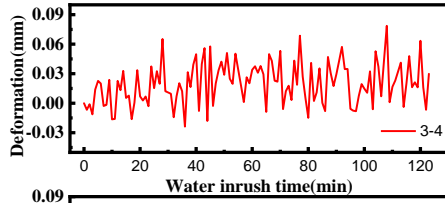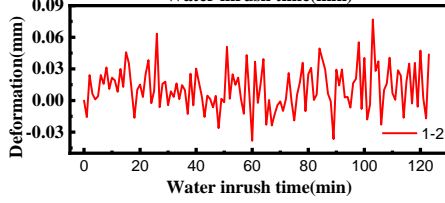

Test-5

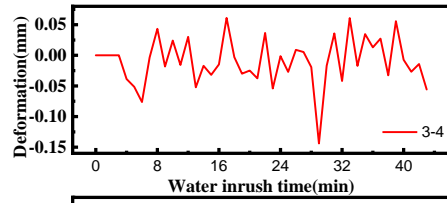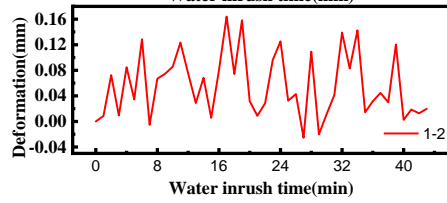

Test-6

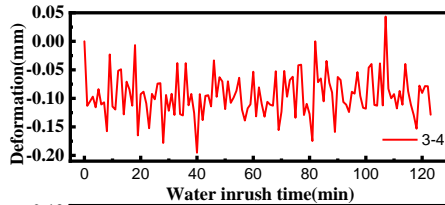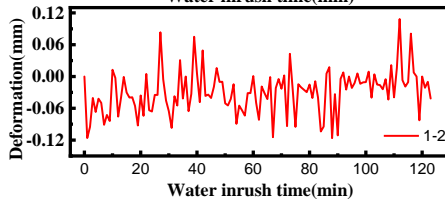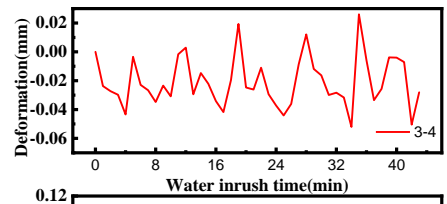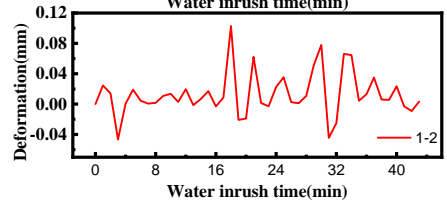

### 3. Diagram of stress change with time after water inrush in roadway

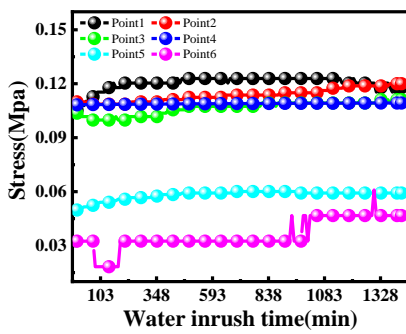

Test-1

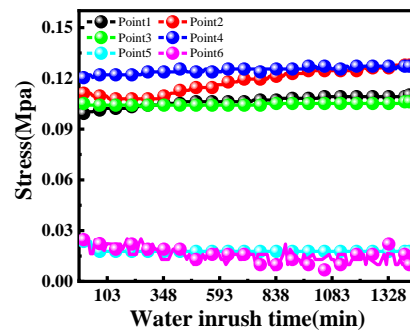

Test-2

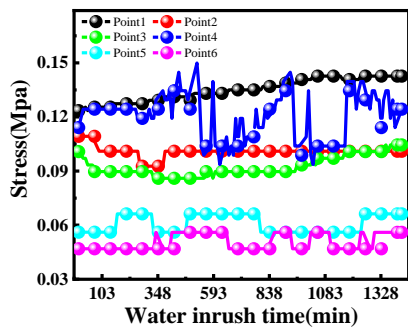

Test-3

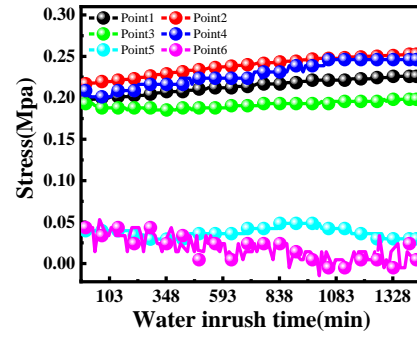

Test-4

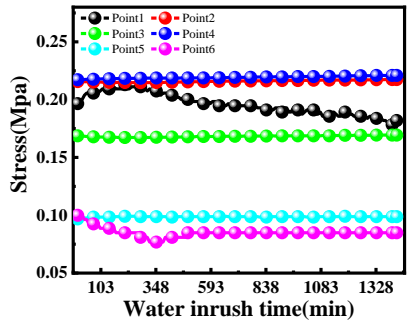

Test-5

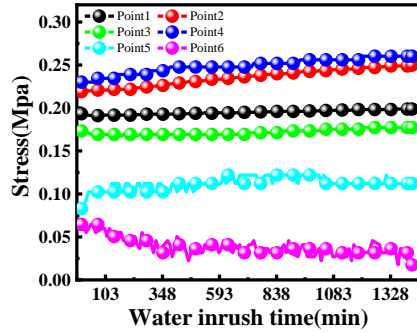

Test-6

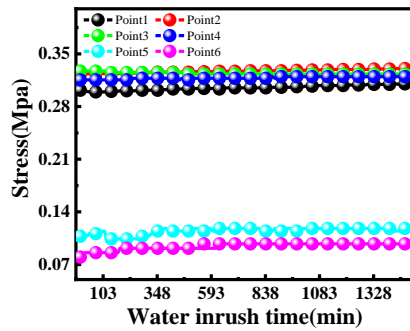

Test-7

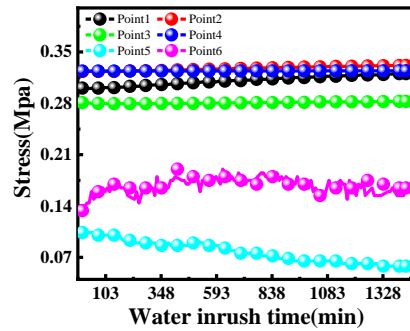

Test-8

**4. Convergence diagram of displacement with time after water inrush in roadway.**

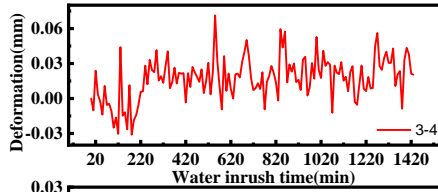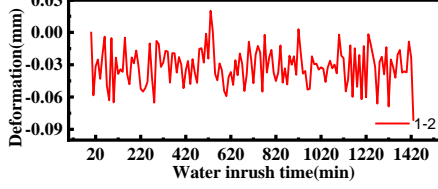

Test-1

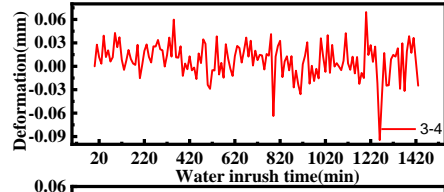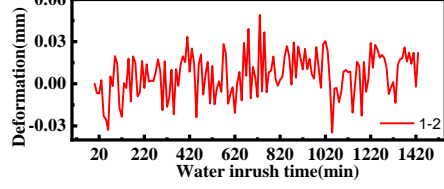

Test-2

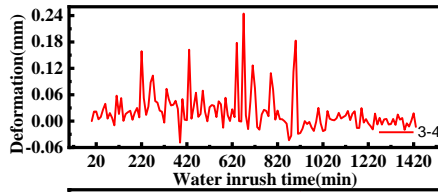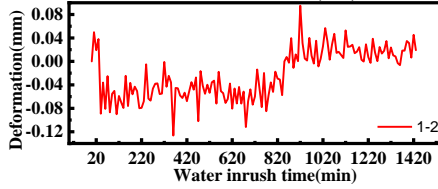

Test-3

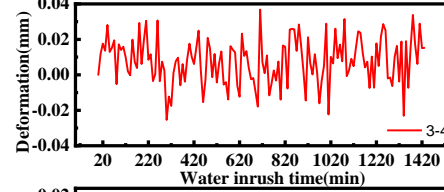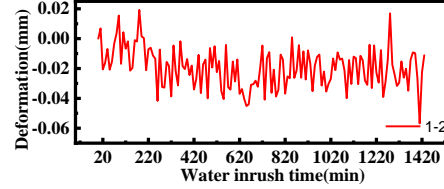

Test-4

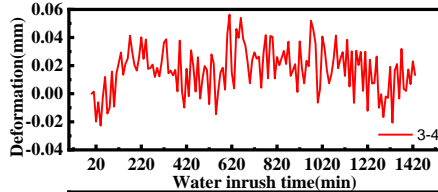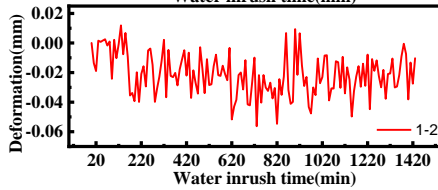

Test-5

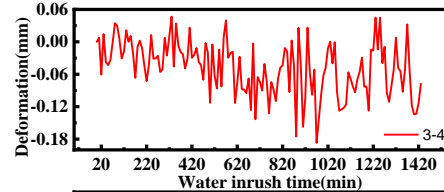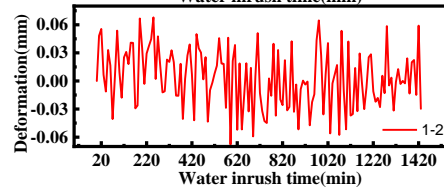

Test-6

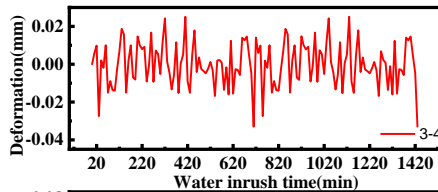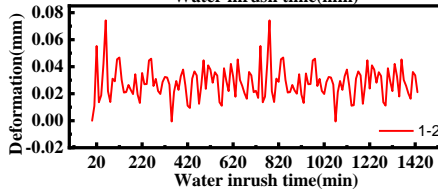

Test-7

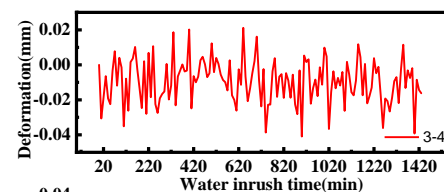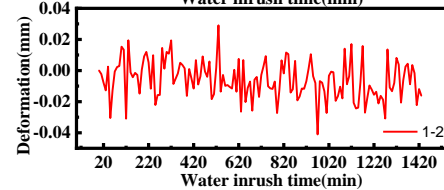

Test-8

## 5. Numerical simulation of seepage velocity diagram in water inrush process.

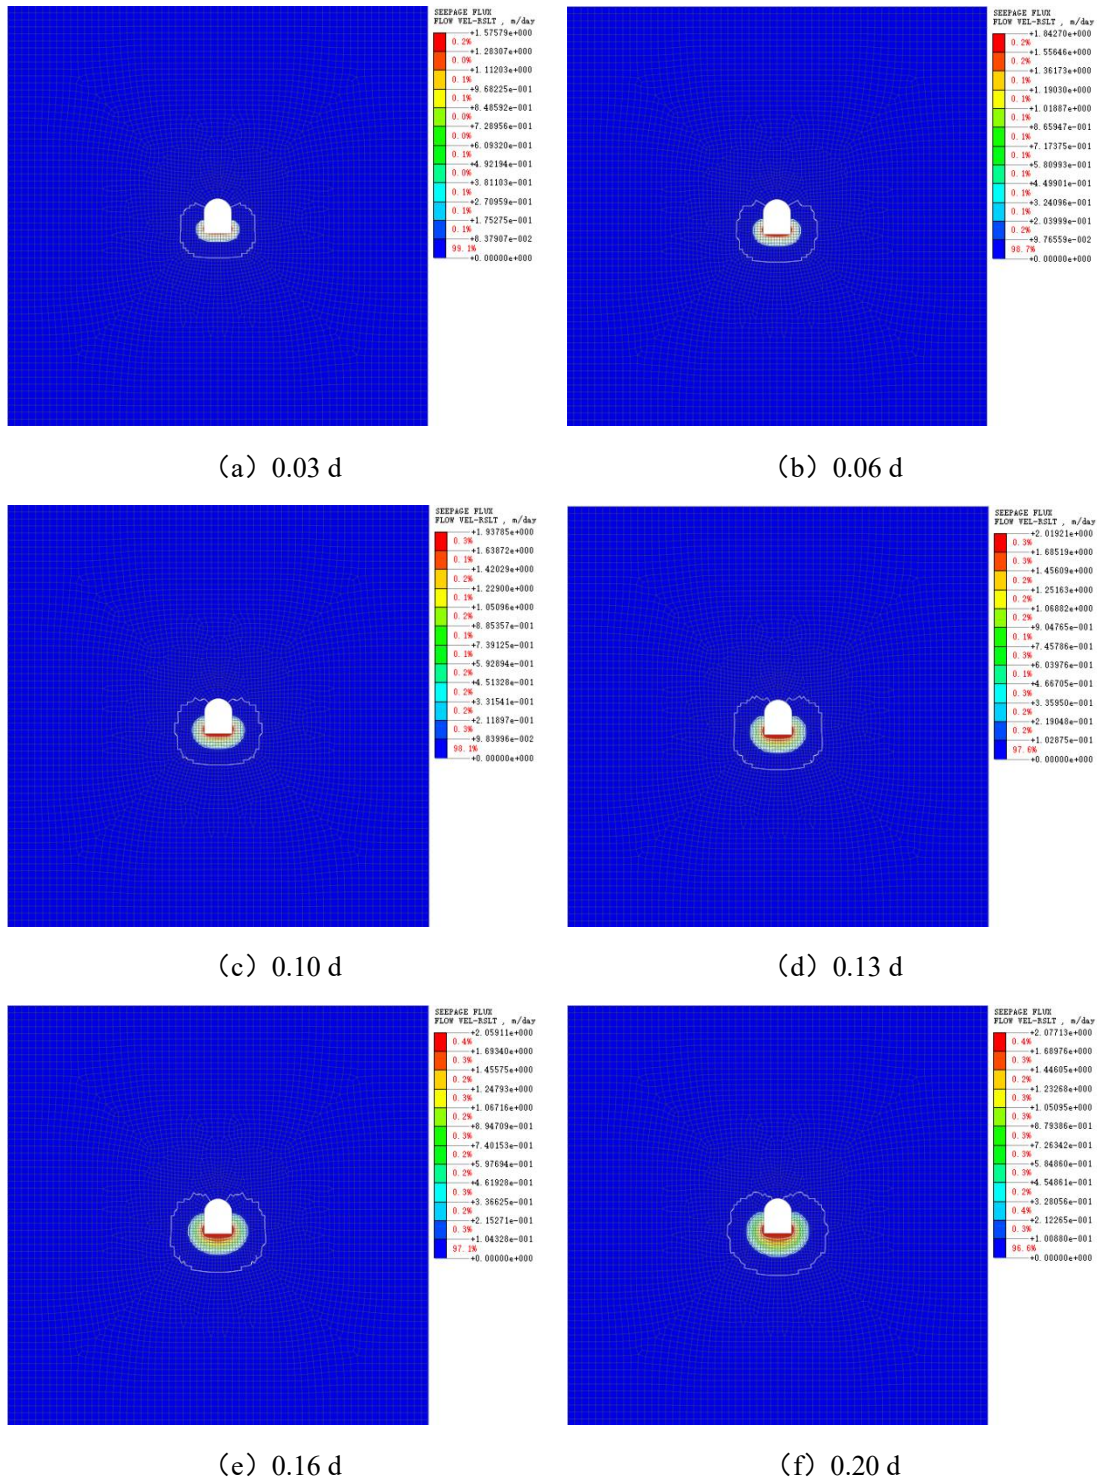

Figure 14. Test-1 Seepage velocity diagram of roadway during water inrush

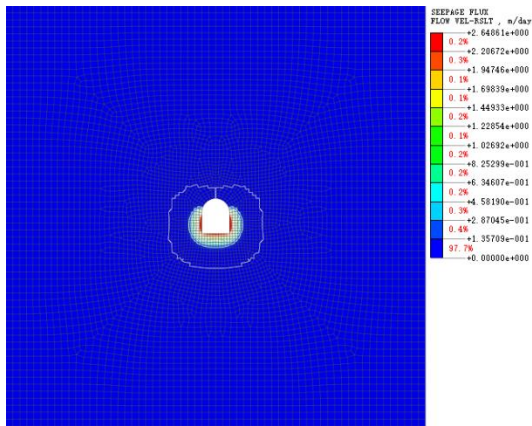

(a) 0.06 d

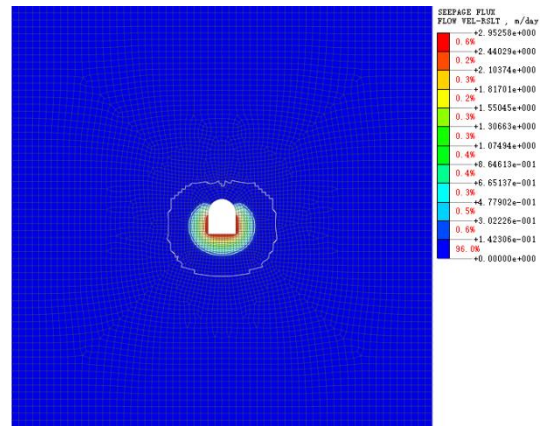

(b) 0.13 d

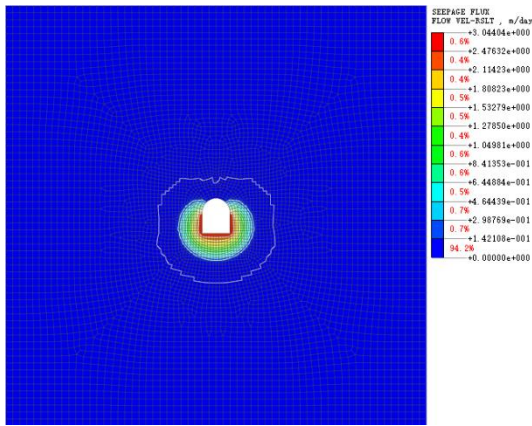

(c) 0.20 d

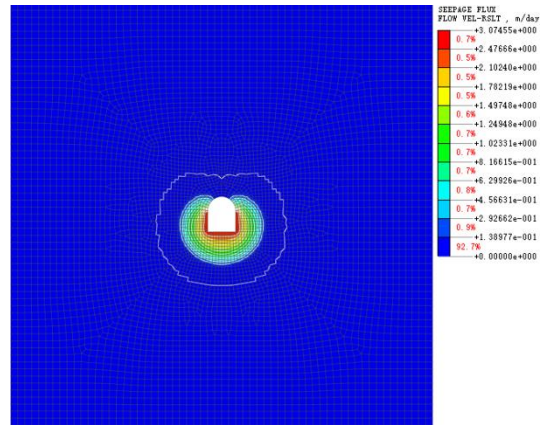

(d) 0.26 d

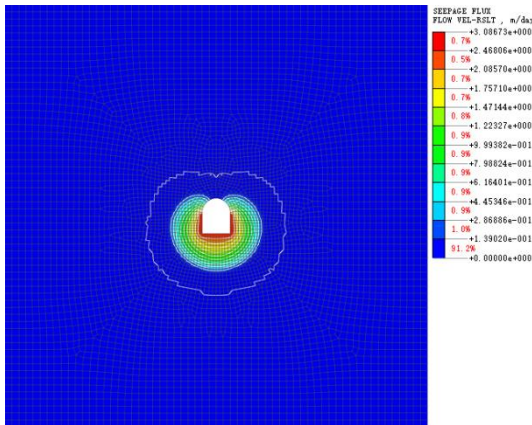

(e) 0.33 d

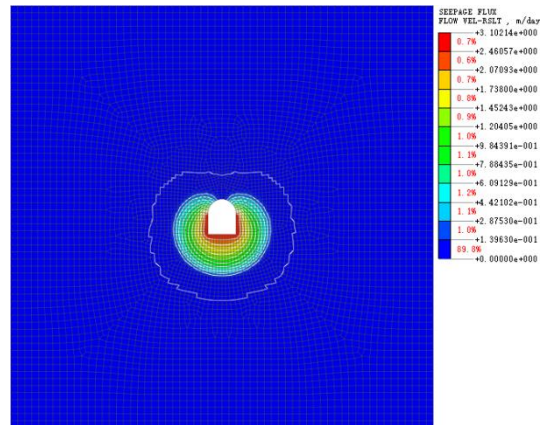

(f) 0.40 d

Figure 15. Test-2 Seepage velocity diagram of roadway during water inrush

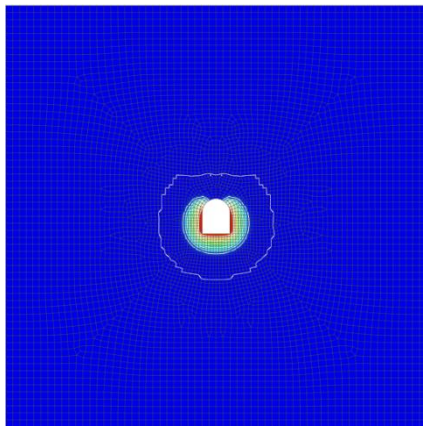

(a) 0.10 d

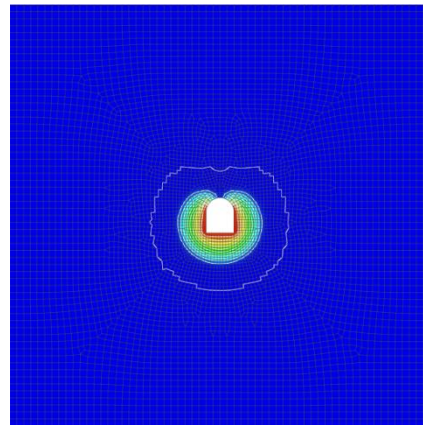

(b) 0.20 d

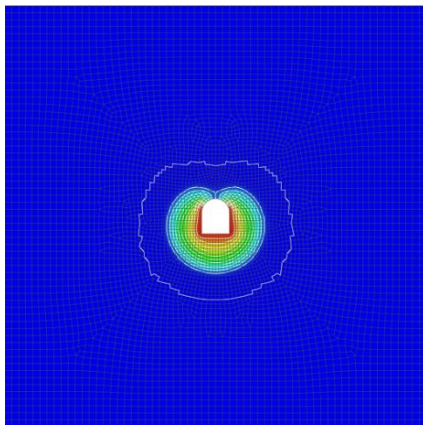

(c) 0.30 d

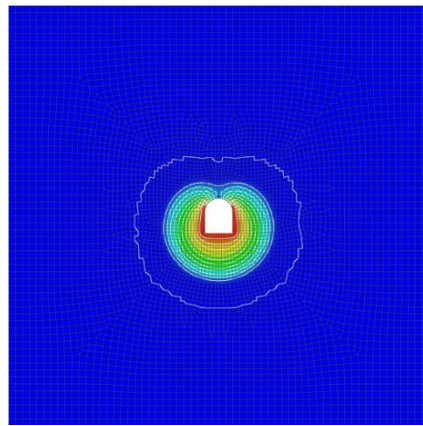

(d) 0.40 d

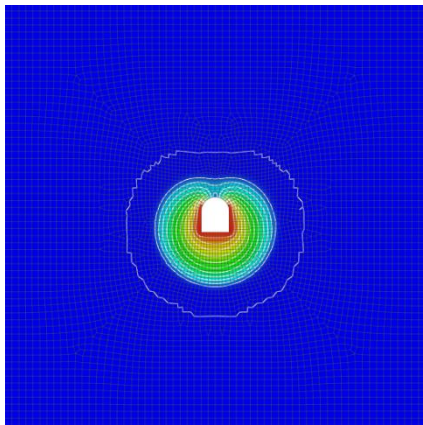

(e) 0.50 d

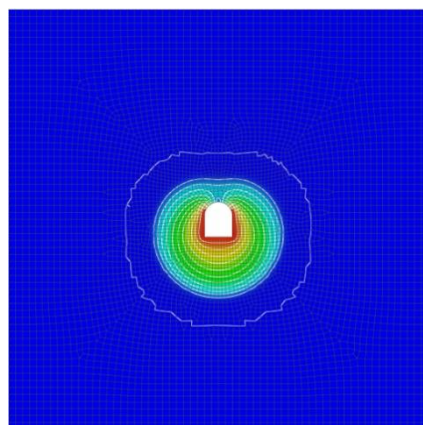

(f) 0.60 d

Figure 16. Test-3 Seepage velocity diagram of roadway during water inrush



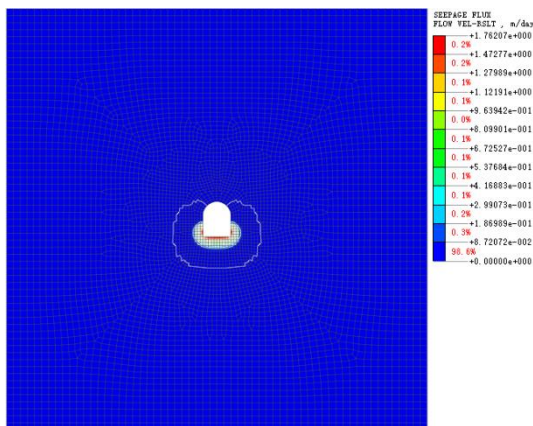

(a) 0.06 d

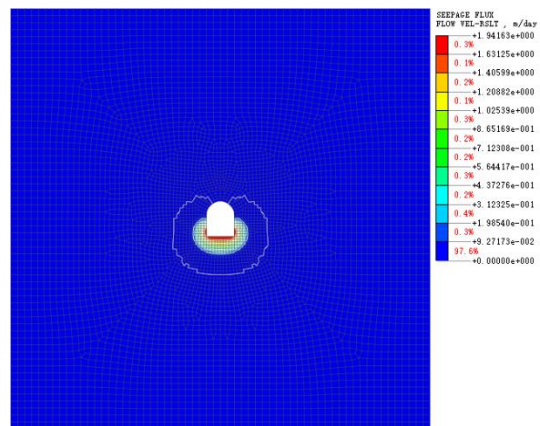

(b) 0.13 d

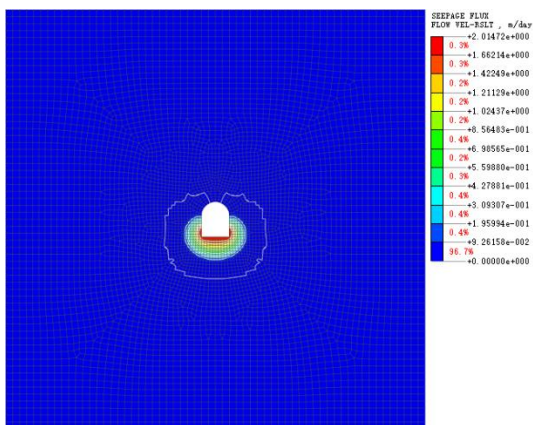

(c) 0.20 d

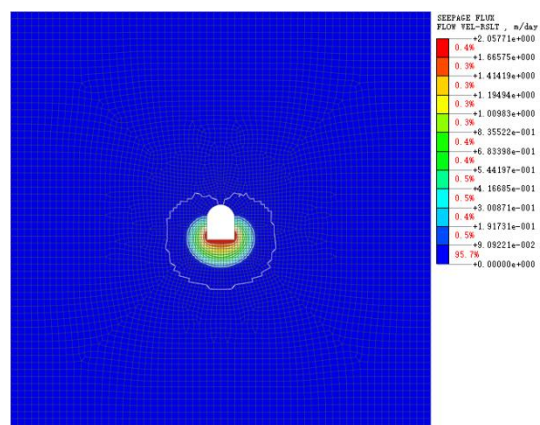

(d) 0.26 d

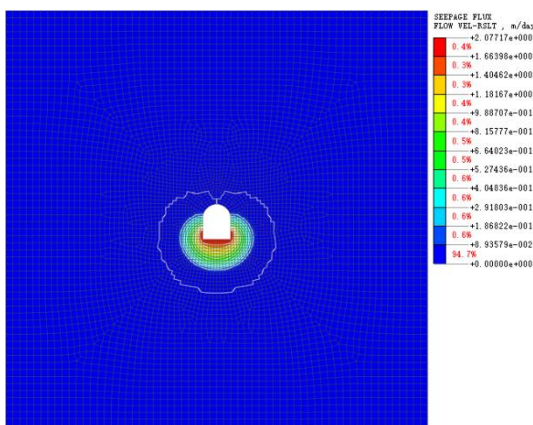

(e) 0.33 d

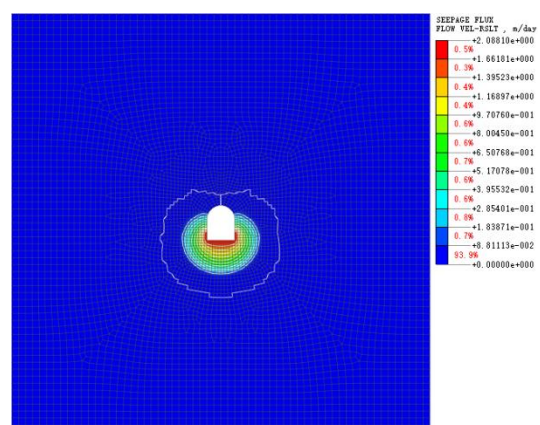

(f) 0.40 d

Figure 17. Test-4 Seepage velocity diagram of roadway during water inrush

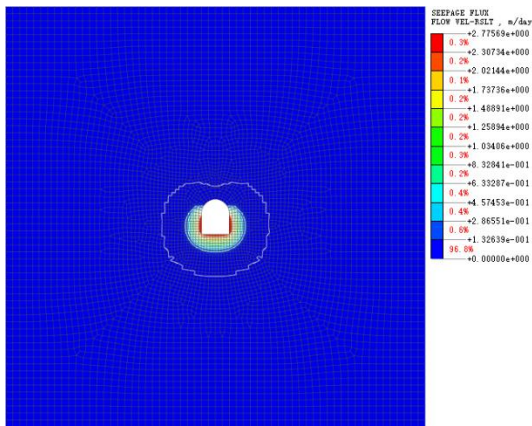

(a) 0.10 d

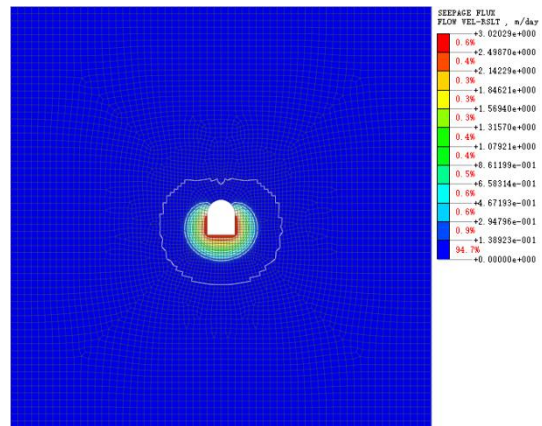

(b) 0.20 d

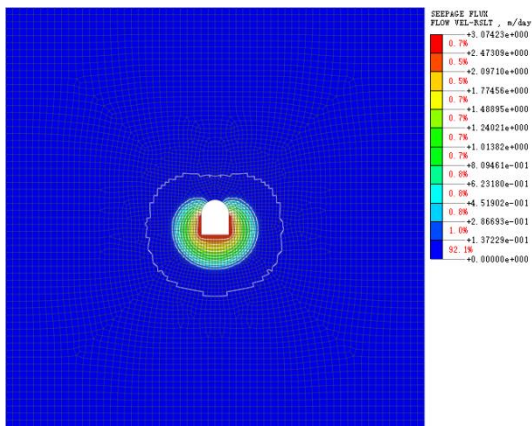

(c) 0.30 d

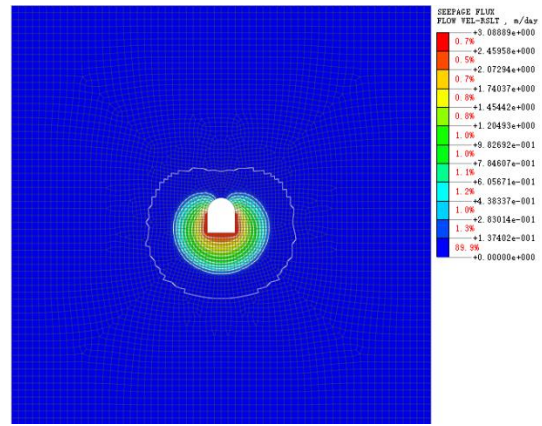

(d) 0.40 d

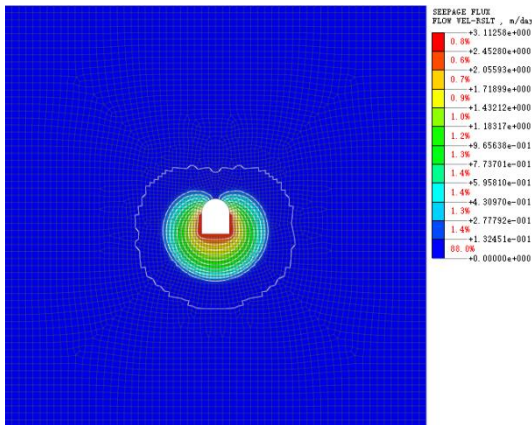

(e) 0.50 d

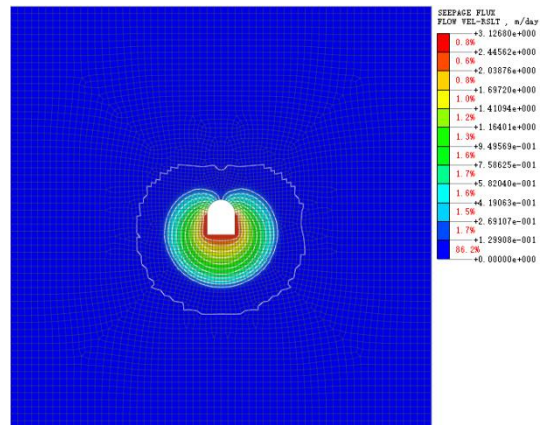

(f) 0.60 d

Figure 18. Test-5 Seepage velocity diagram of roadway during water inrush

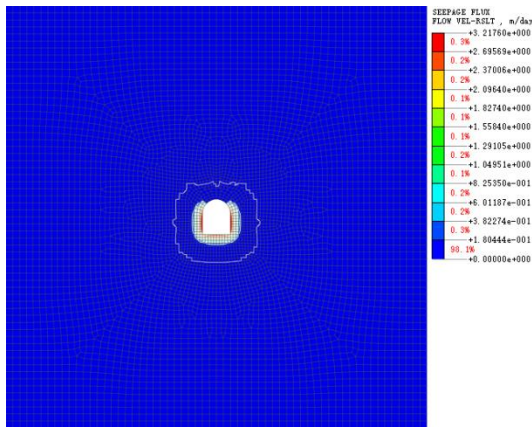

(a) 0.03 d

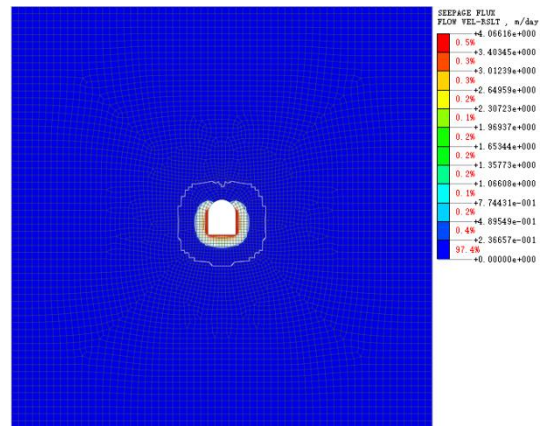

(b) 0.06 d

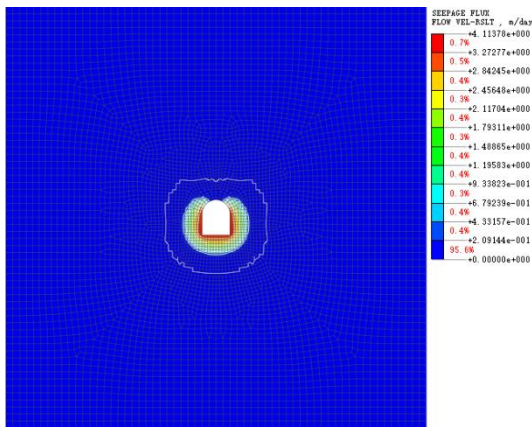

(c) 0.10 d

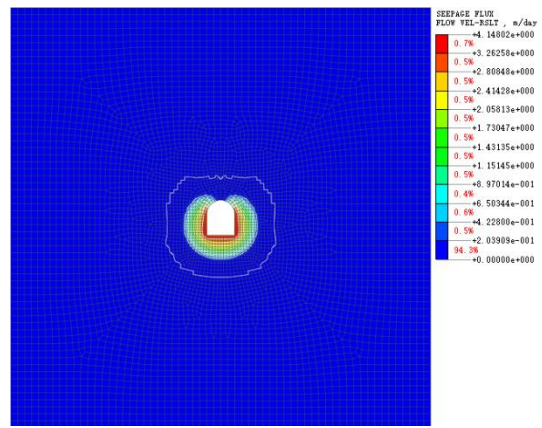

(d) 0.13 d

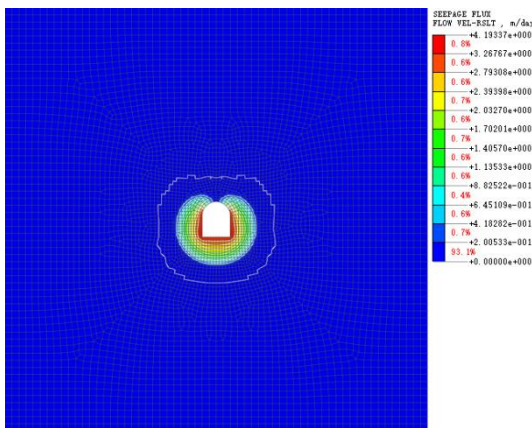

(e) 0.16 d

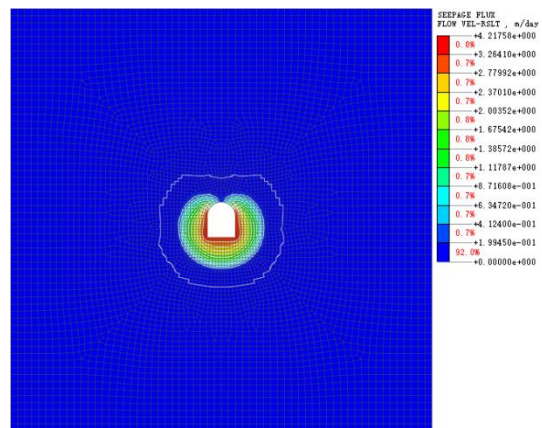

(f) 0.20 d

Figure 19. Test-6 Seepage velocity diagram of roadway during water inrush

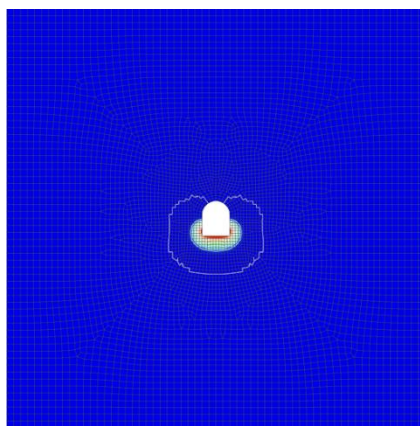

(a) 0.10 d

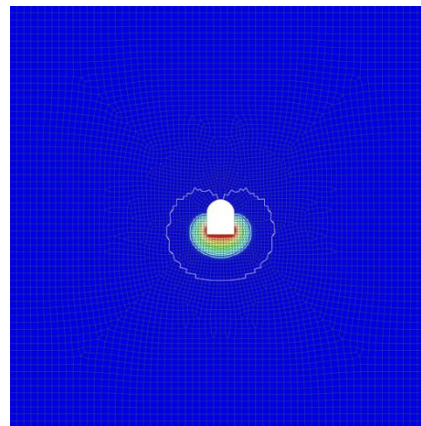

(b) 0.20 d

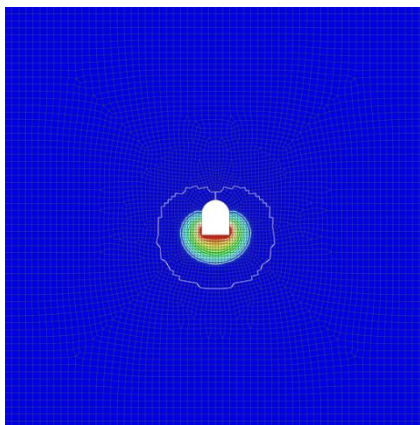

(c) 0.30 d

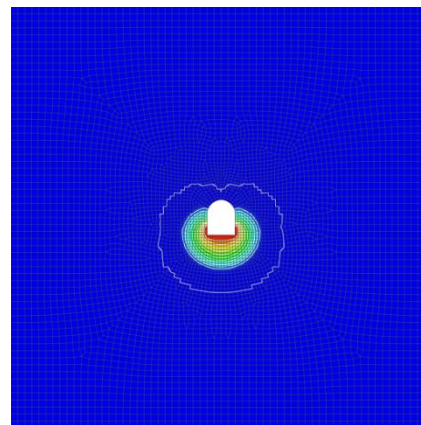

(d) 0.40 d

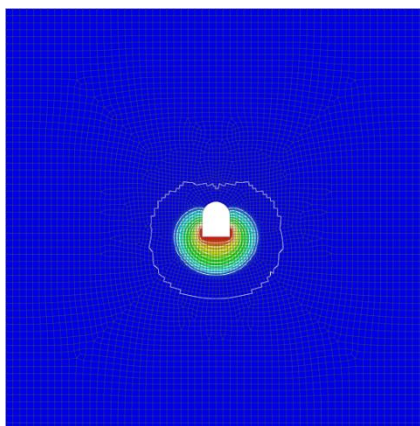

(e) 0.50 d

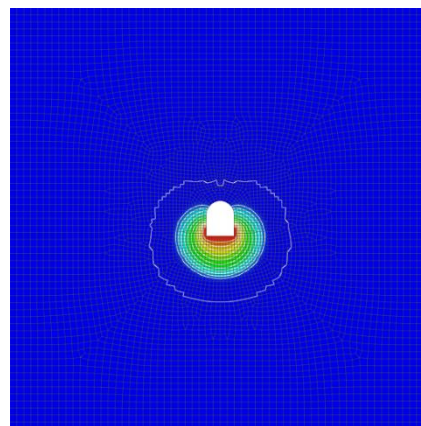

(f) 0.60 d

Figure 20. Test-7 Seepage velocity diagram of roadway during water inrush

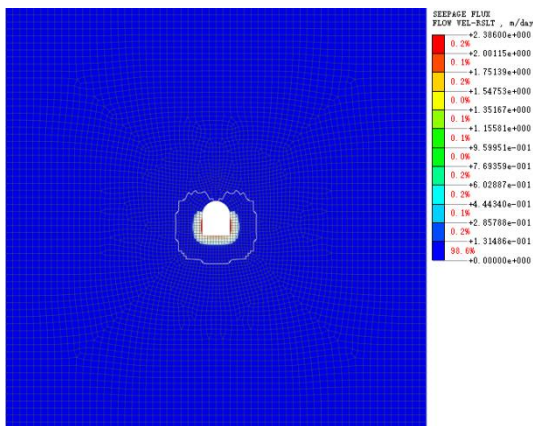

(a) 0.03 d

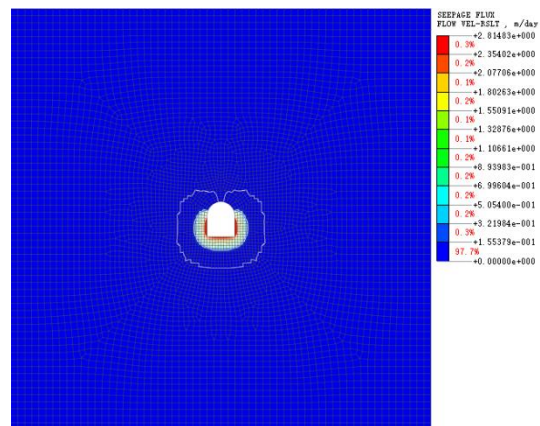

(b) 0.06 d

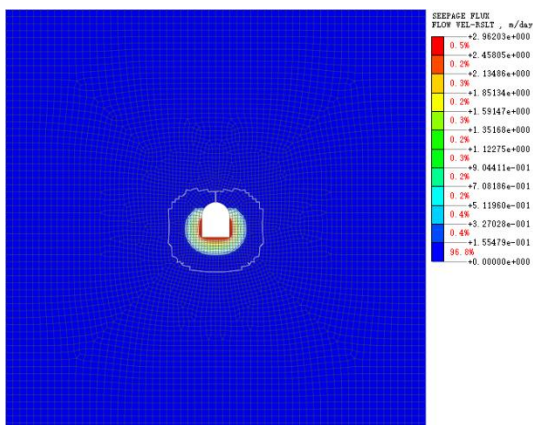

(c) 0.10 d

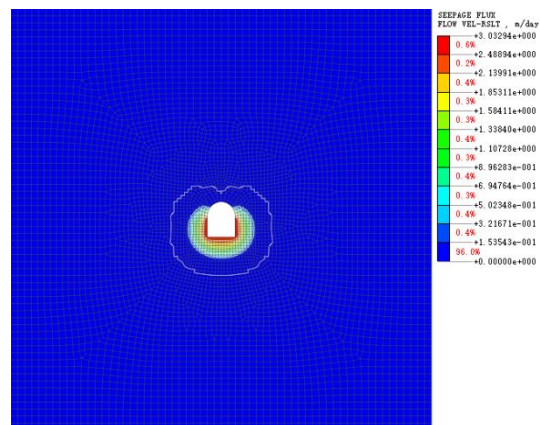

(d) 0.13 d

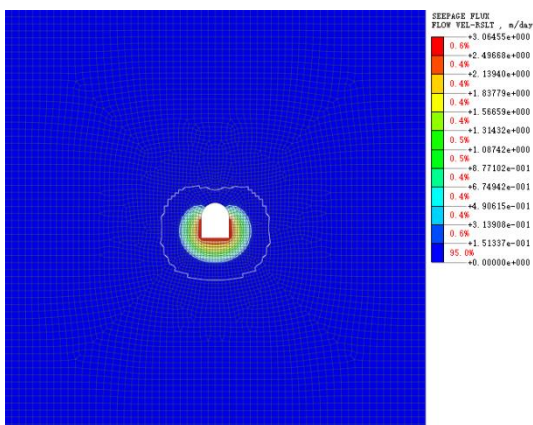

(e) 0.16 d

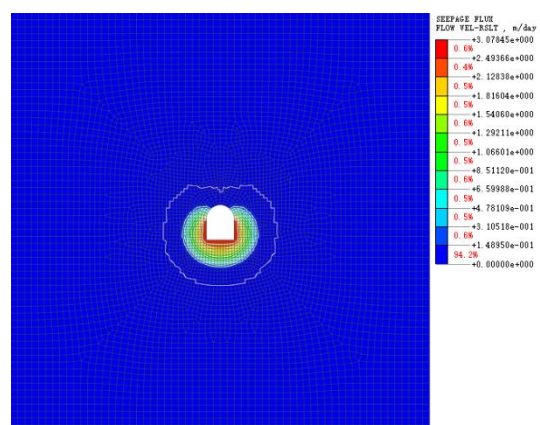

(f) 0.20 d

Figure 21. Test-8 Seepage velocity diagram of roadway during water inrush

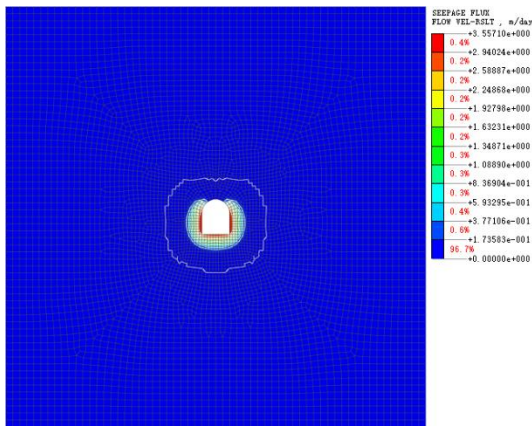

(a) 0.06 d

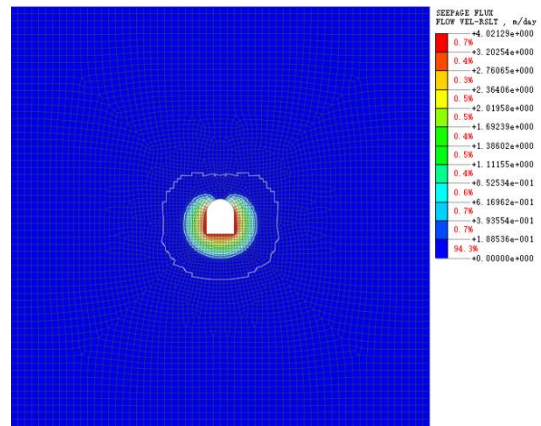

(b) 0.13 d

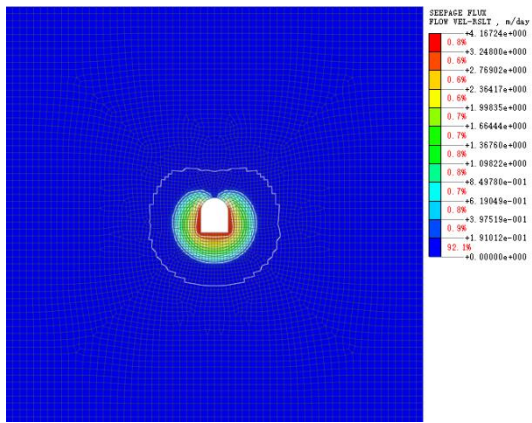

(c) 0.20 d

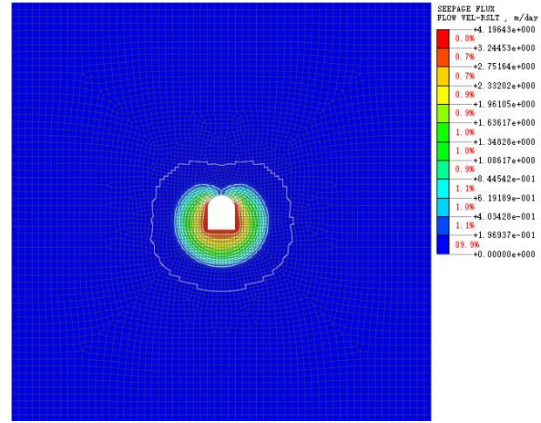

(d) 0.26 d

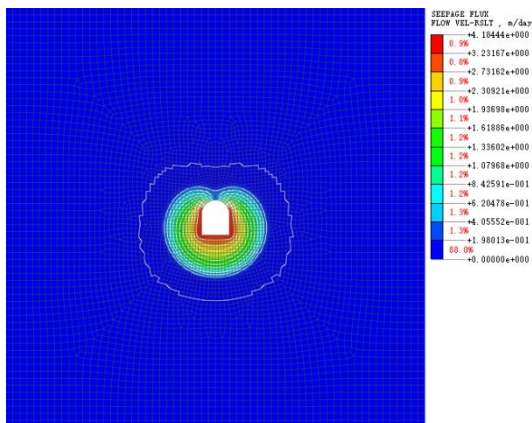

(e) 0.33 d

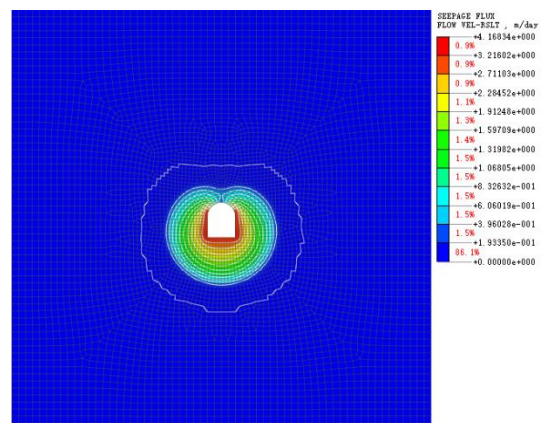

(f) 0.40 d

Figure 21. Test-9 Seepage velocity diagram of roadway during water inrush

## 6. Numerical simulation of seepage velocity diagram after water inrush in roadway.

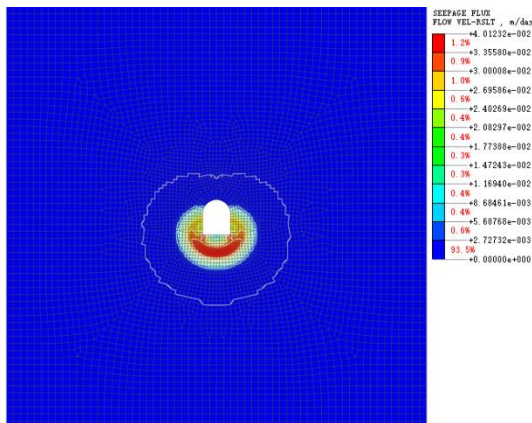

(a) 1 d

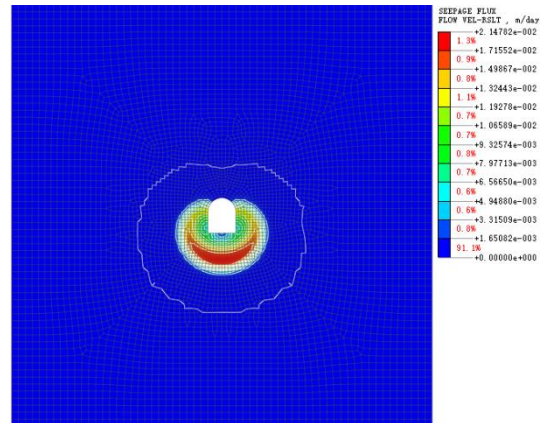

(b) 2 d

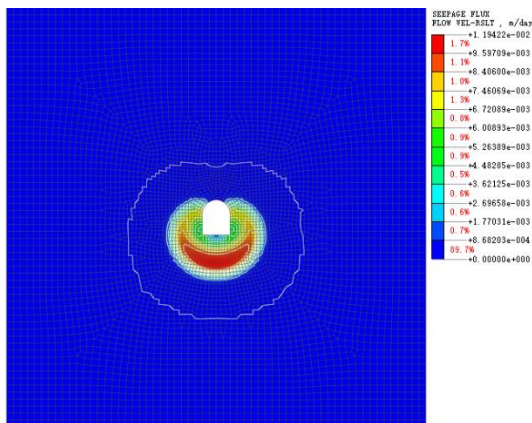

(c) 3 d

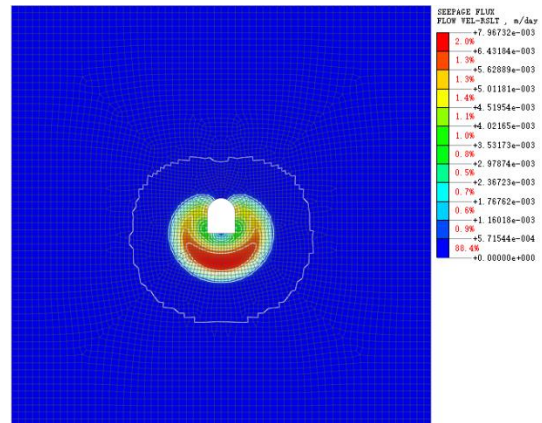

(d) 4 d

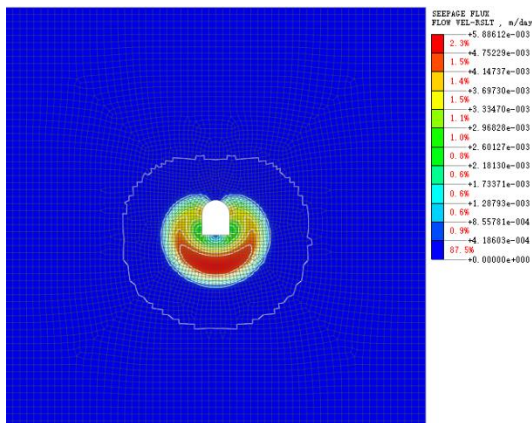

(e) 5 d

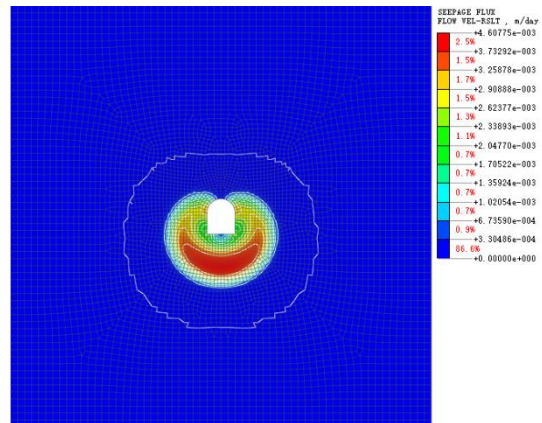

(f) 6 d

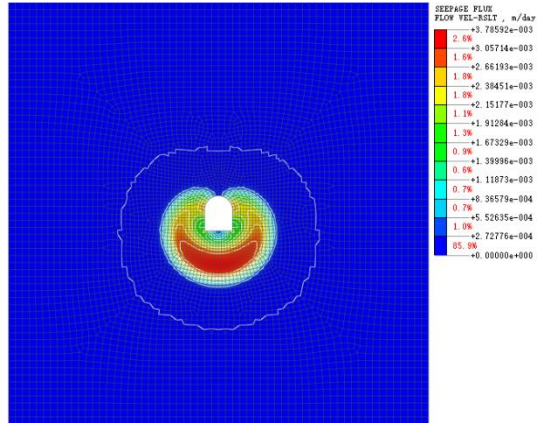

(g) 7 d

Figure 22. Test-1 Seepage velocity diagram of roadway after water inrush

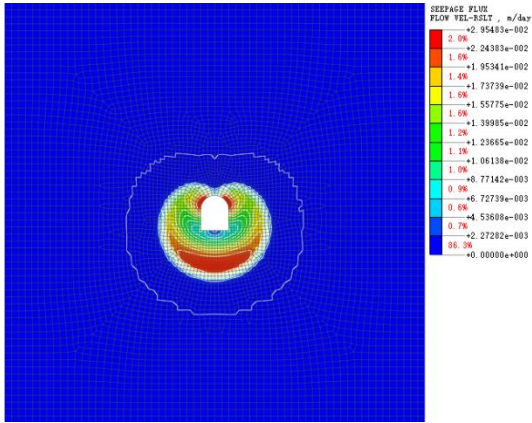

(a) 1 d

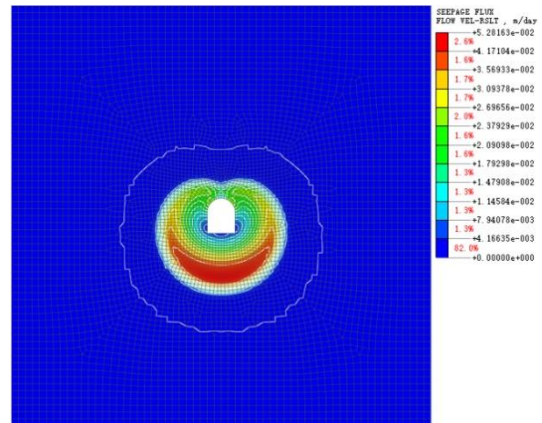

(b) 2 d

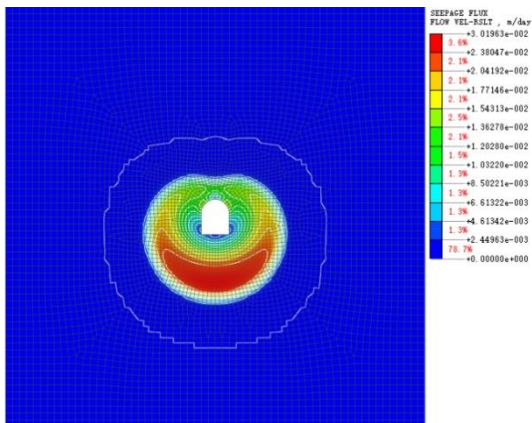

(c) 3 d

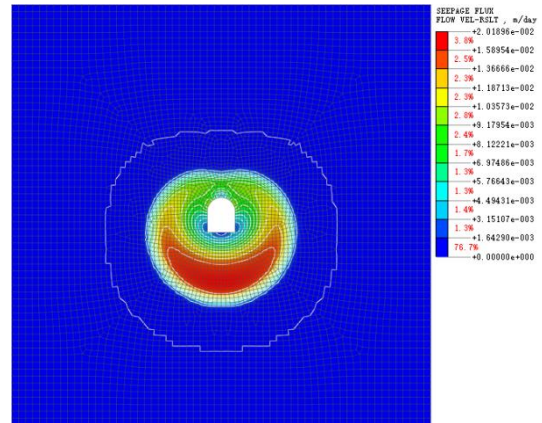

(d) 4 d



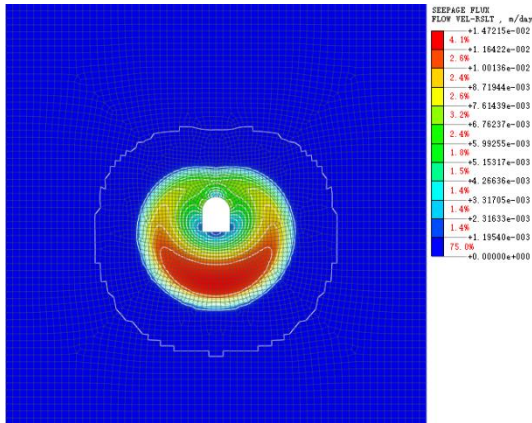

(e) 5 d

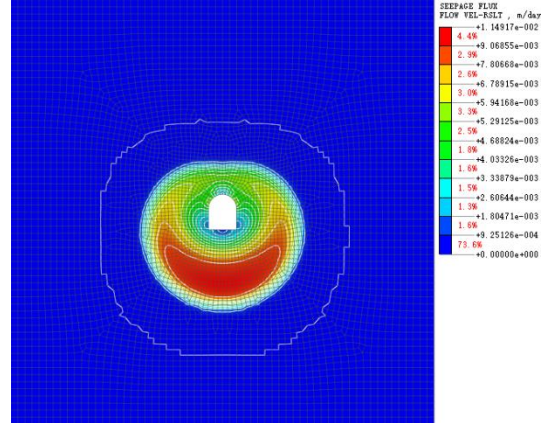

(f) 6 d

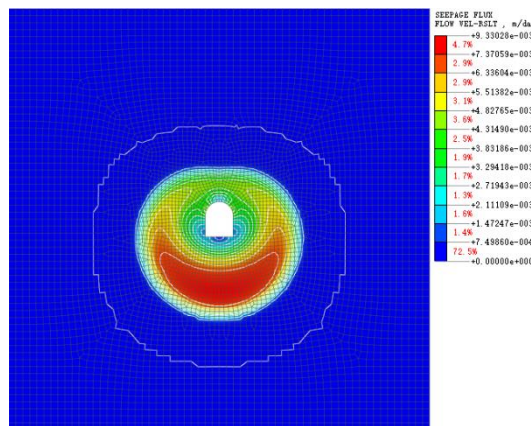

(g) 7 d

Figure 23. Test-2 Seepage velocity diagram of roadway after water inrush

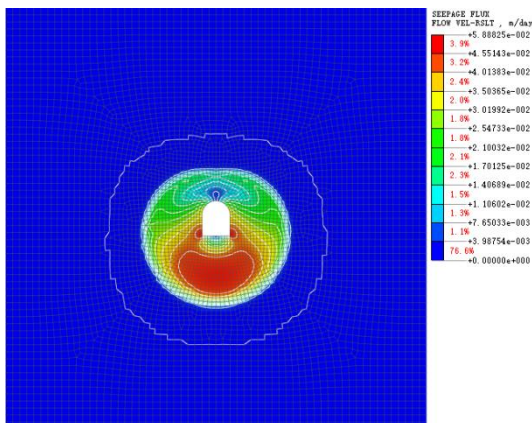

(a) 1 d

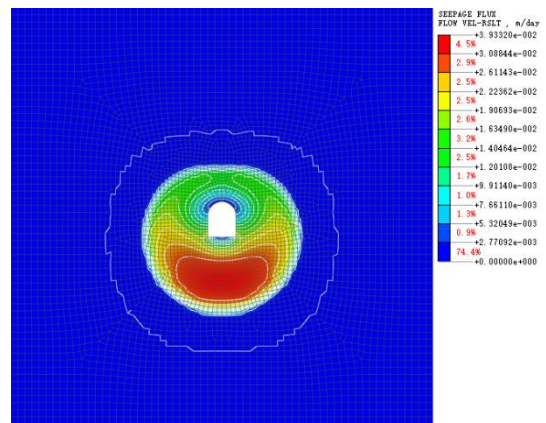

(b) 2 d

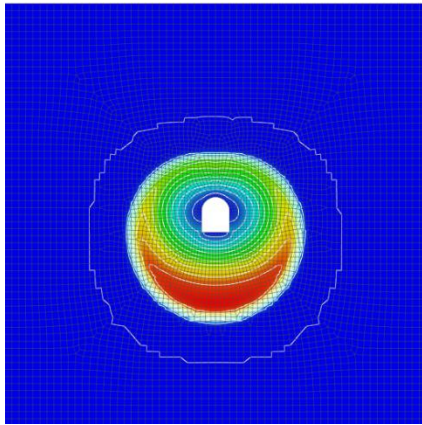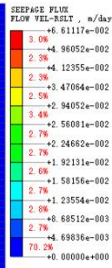

(c) 3 d

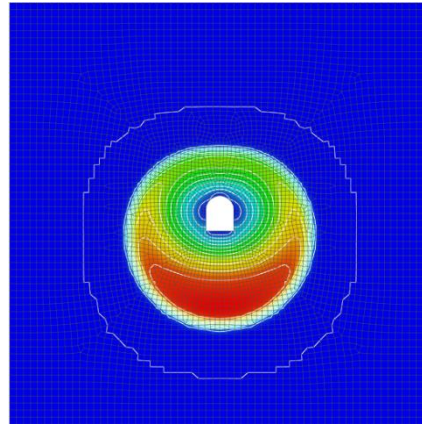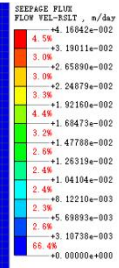

(d) 4 d

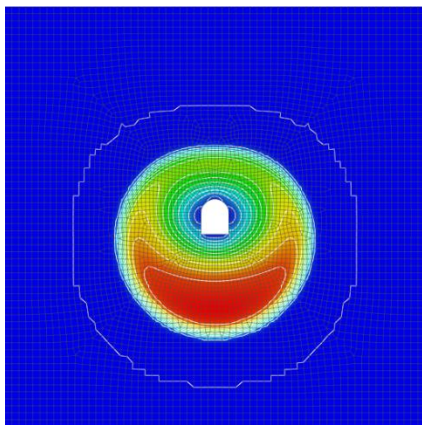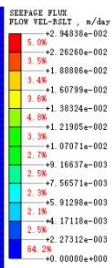

(e) 5 d

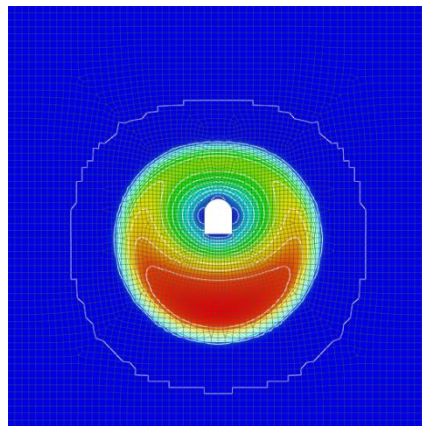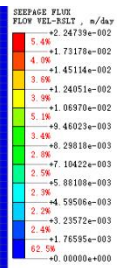

(f) 6 d

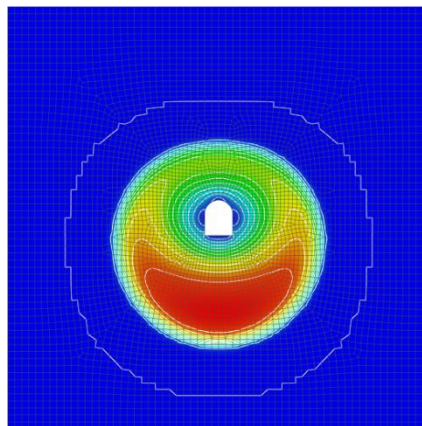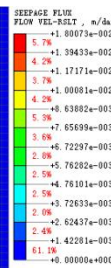

(g) 7 d

Figure 24. Test-3 Seepage velocity diagram of roadway after water inrush

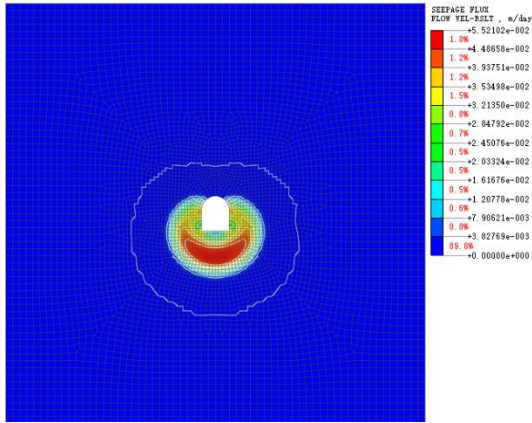

(a) 1 d

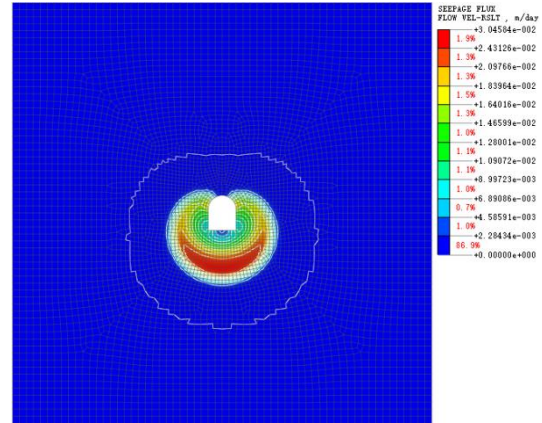

(b) 2 d

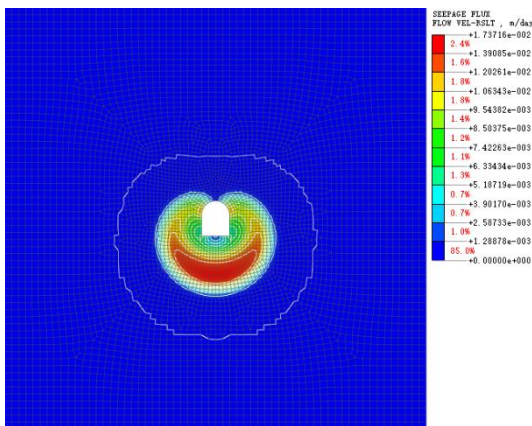

(c) 3 d

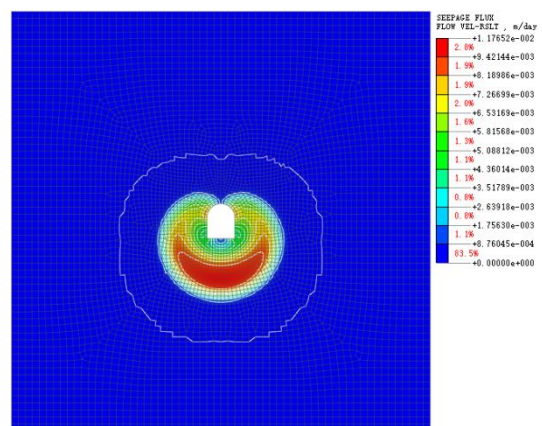

(d) 4 d

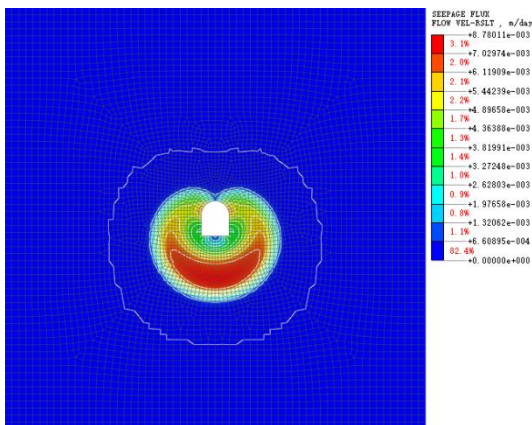

(e) 5 d

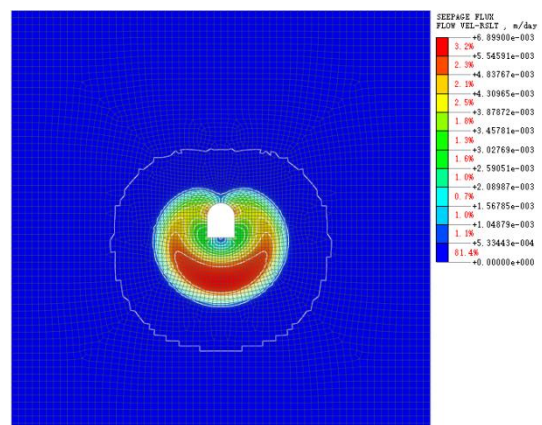

(f) 6 d

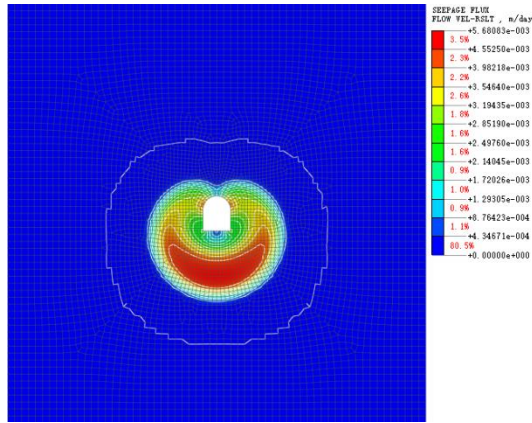

(g) 7 d

Figure 25. Test-4 Seepage velocity diagram of roadway after water inrush

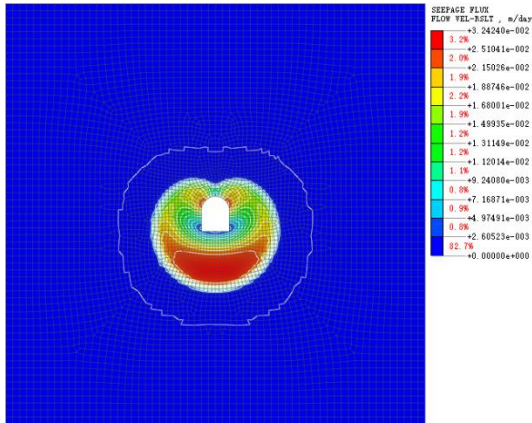

(a) 1 d

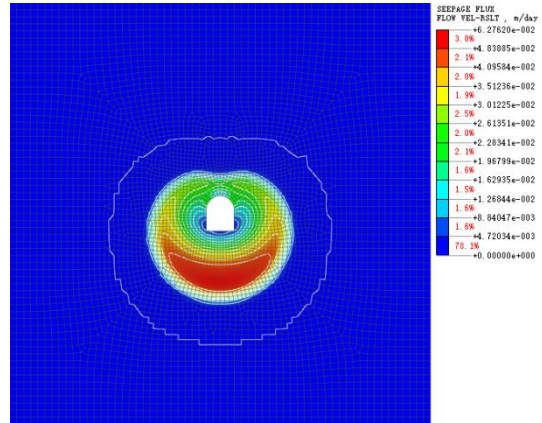

(b) 2 d

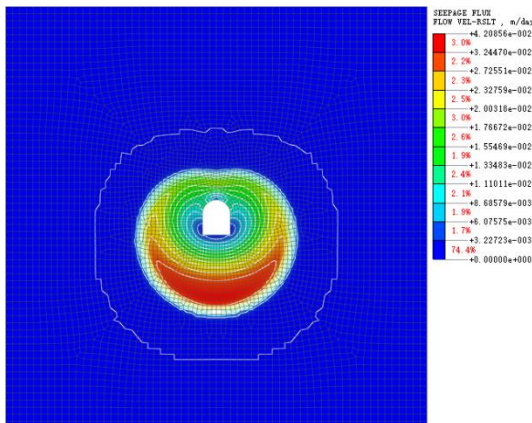

(c) 3 d

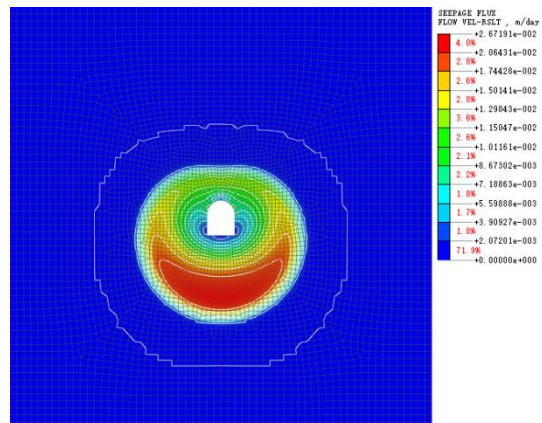

(d) 4 d

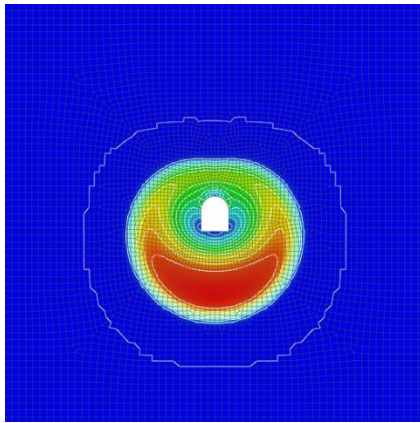

(e) 5 d

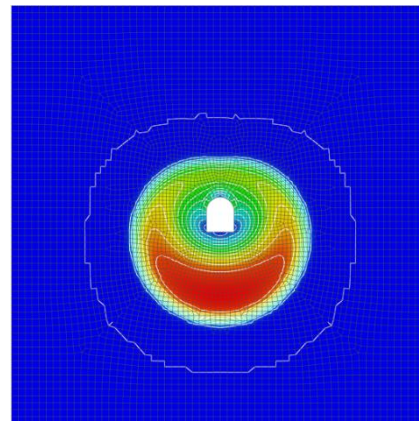

(f) 6 d

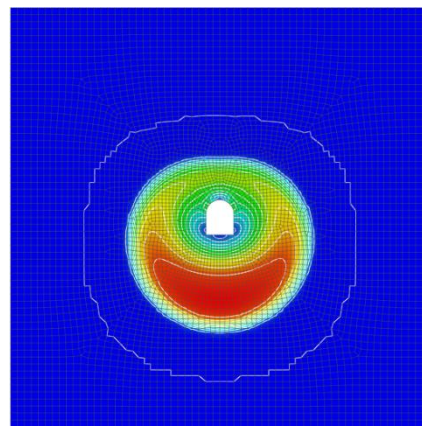

(g) 7 d

Figure 26. Test-5 Seepage velocity diagram of roadway after water inrush

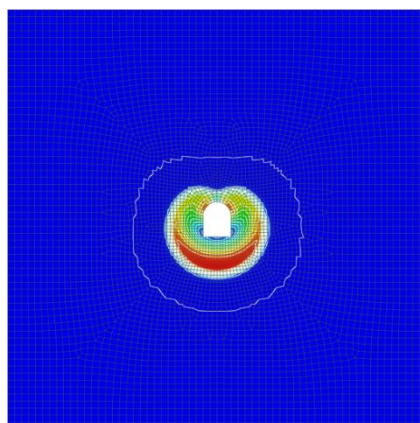

(a) 1 d

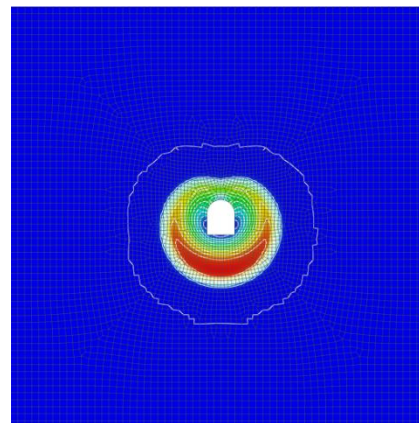

(b) 2 d

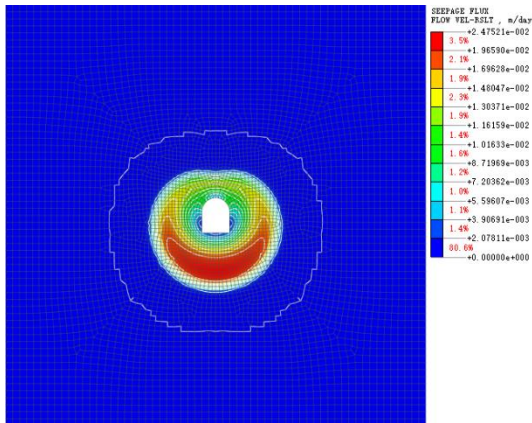

(c) 3 d

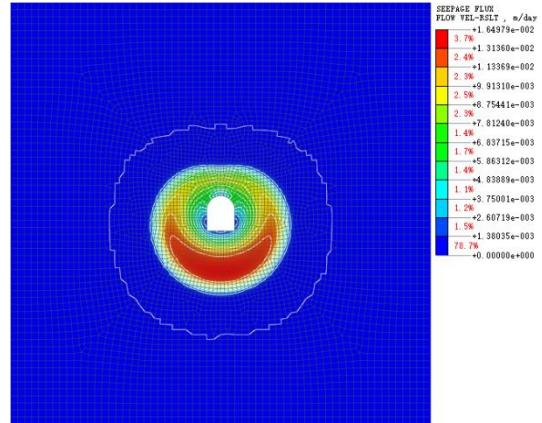

(d) 4 d

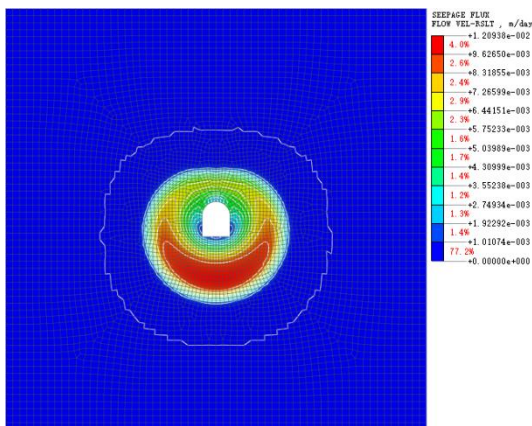

(e) 5 d

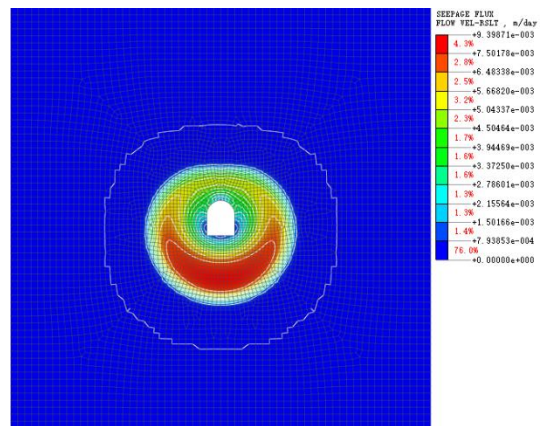

(f) 6 d

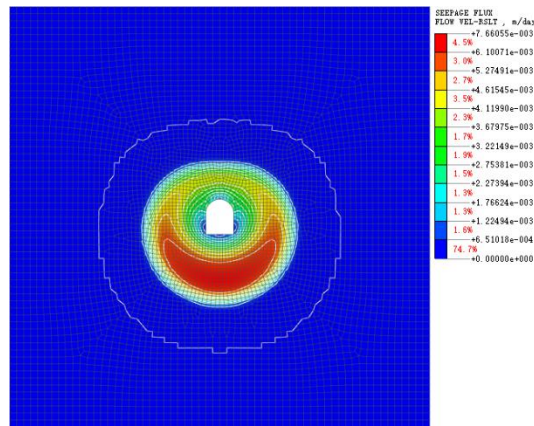

(g) 7 d

Figure 27. Test-6 Seepage velocity diagram of roadway after water inrush

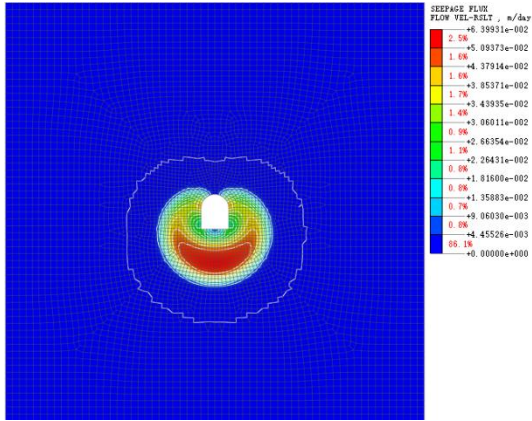

(a) 1 d

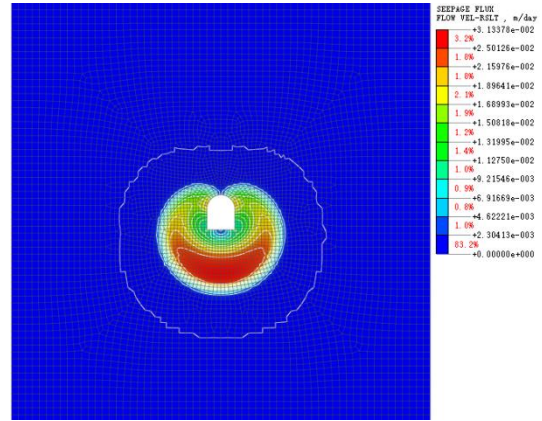

(b) 2 d

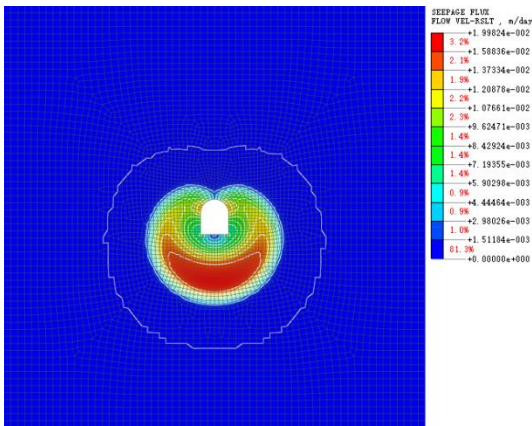

(c) 3 d

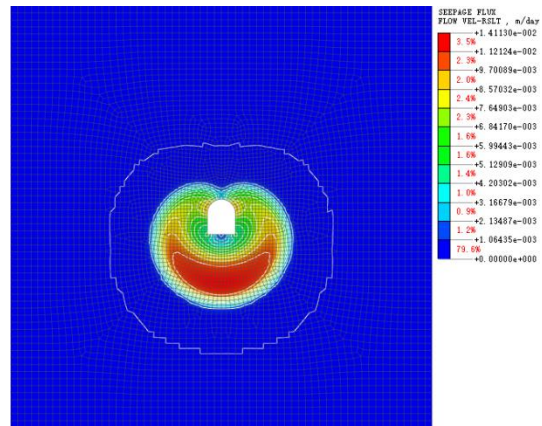

(d) 4 d

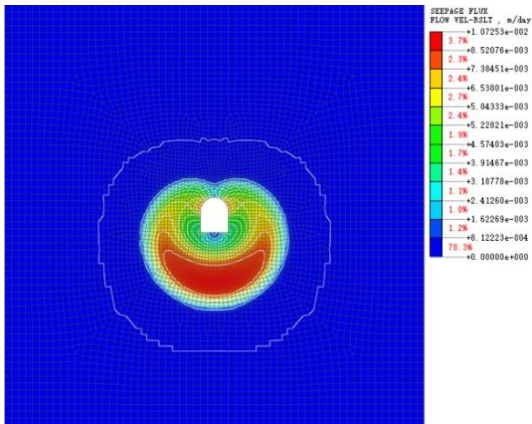

(e) 5 d

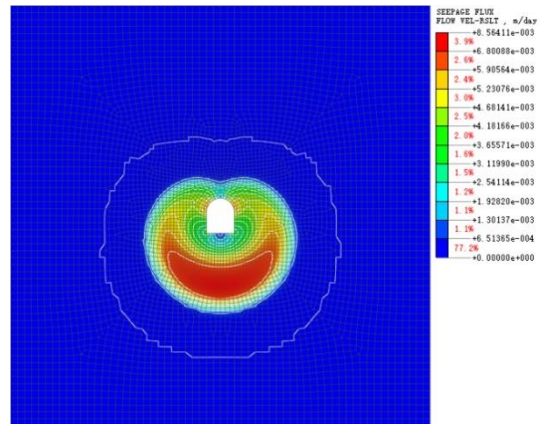

(f) 6 d

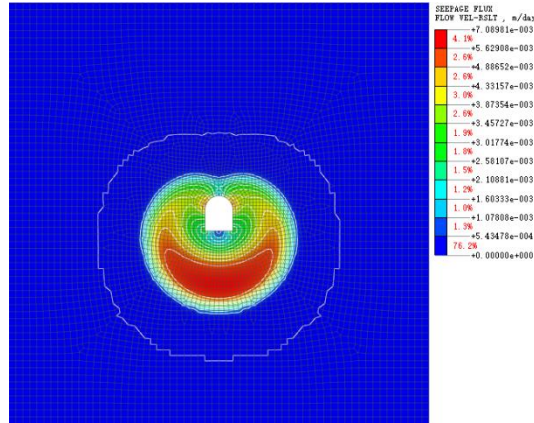

(g) 7 d

Figure 28. Test-7 Seepage velocity diagram of roadway after water inrush

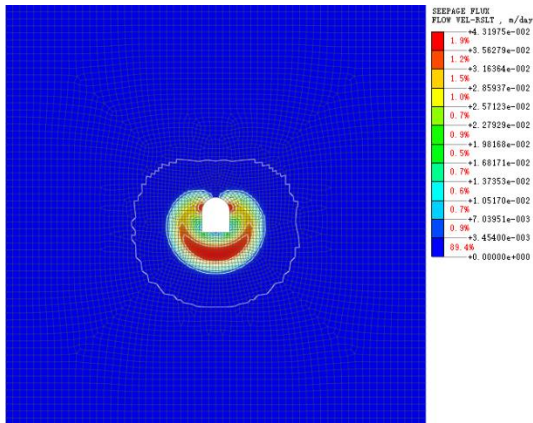

(a) 1 d

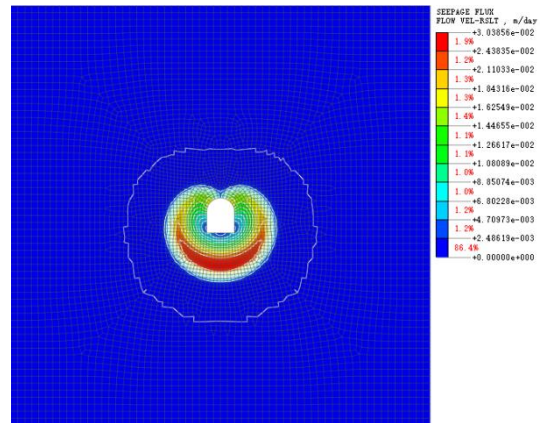

(b) 2 d

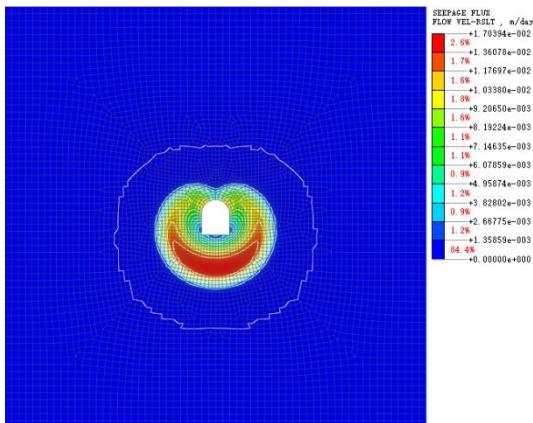

(c) 3 d

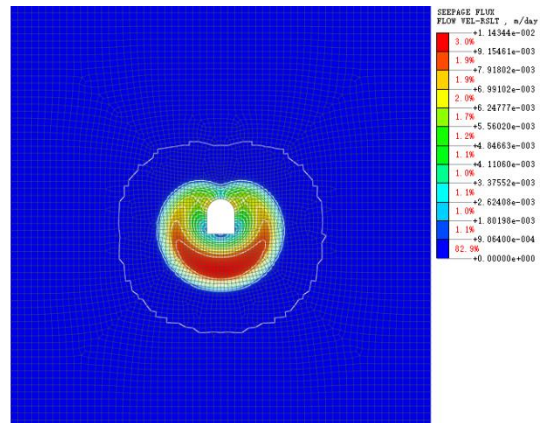

(d) 4 d



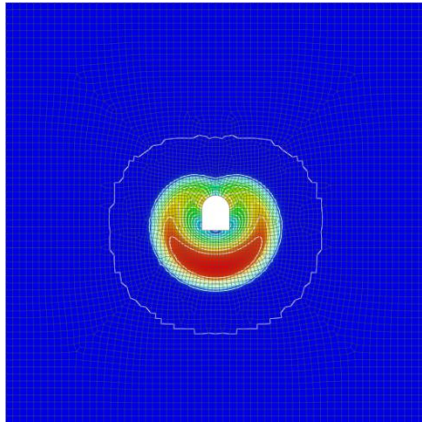

(e) 5 d

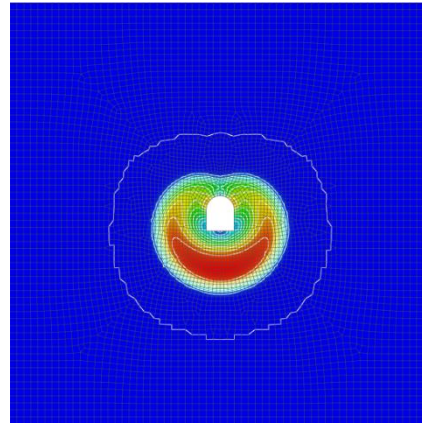

(f) 6 d

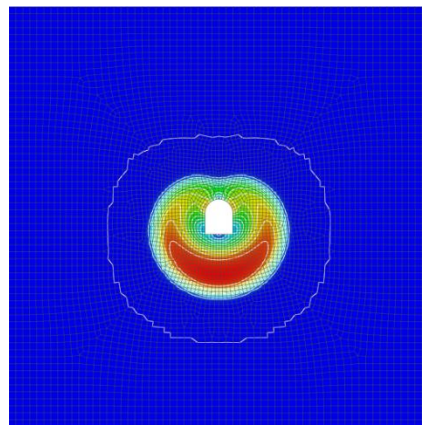

(g) 7 d

Figure 29. Test-8 Seepage velocity diagram of roadway after water inrush

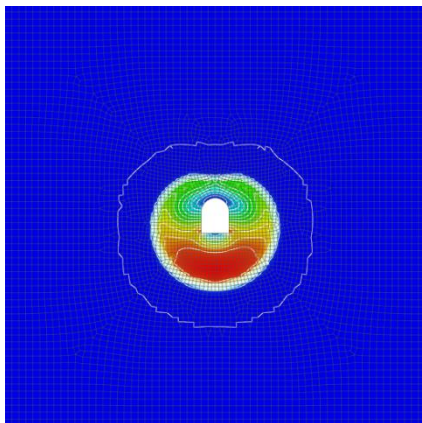

(a) 1 d

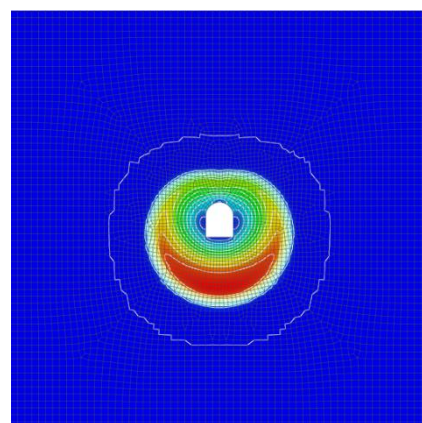

(b) 2 d

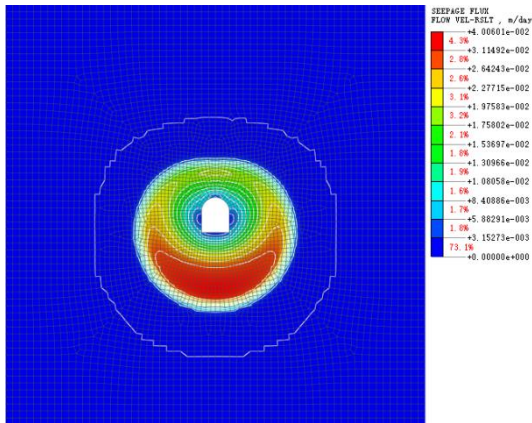

(c) 3 d

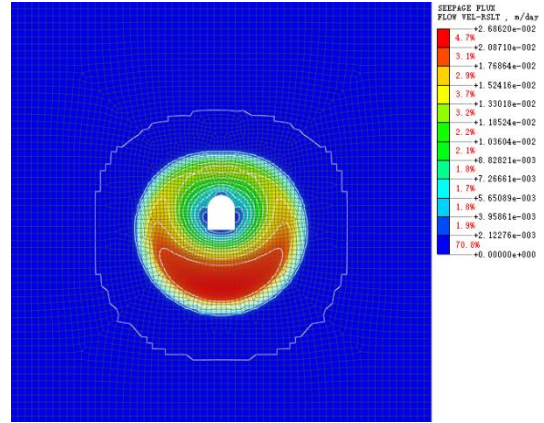

(d) 4 d

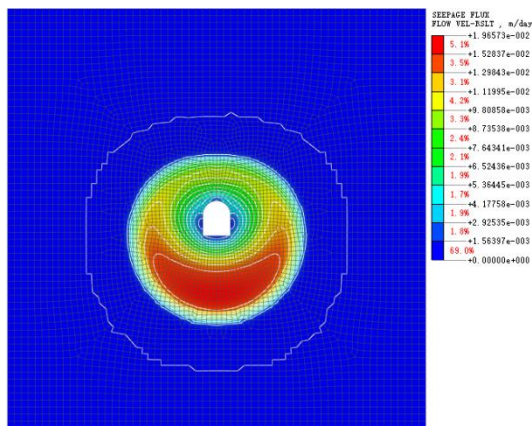

(e) 5 d

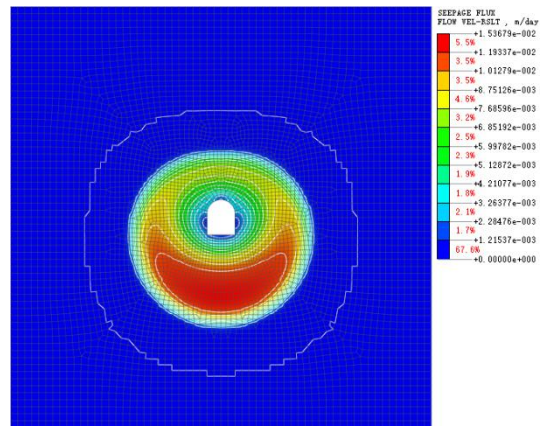

(f) 6 d

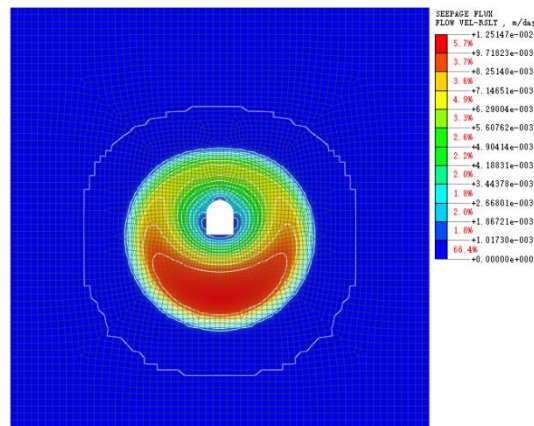

(g) 7 d

Figure 30. Test-9 Seepage velocity diagram of roadway after water inrush
